# Supplementary material for: Sperm DNA methylation altered by THC and nicotine: Vulnerability of neurodevelopmental genes with bivalent chromatin
Source: PubMed Central journal article supplement (PMC7525661; doi:10.1038/s41598-020-72783-0), 2020-09-29
Supplement: 41598_2020_72783_MOESM1_ESM.pdf [file 41598_2020_72783_MOESM1_ESM.pdf]

# **Sperm DNA Methylation Altered by THC and Nicotine: Vulnerability of Neurodevelopmental Genes with Bivalent Chromatin**

## ***Supplementary Materials***

Rose Schrott<sup>1,2</sup>, Maya Rajavel<sup>1</sup>, Kelly Acharya<sup>3</sup>, Zhiqing Huang<sup>3</sup>, Chaitanya Acharya<sup>4</sup>, Andrew Hawkey<sup>5</sup>, Erica Pippen<sup>5</sup>, H. Kim Lyerly<sup>4</sup>, Edward D. Levin<sup>5</sup>, \*Susan K. Murphy<sup>1,2,6</sup>.

<sup>1</sup>Department of Obstetrics and Gynecology, Division of Reproductive Sciences, Duke University Medical Center, Durham, North Carolina

<sup>2</sup>Integrated Toxicology and Environmental Health Program, Nicholas School of the Environment, Duke University, Durham, North Carolina

<sup>3</sup>Department of Obstetrics and Gynecology, Division of Reproductive Endocrinology and Infertility, Duke University Medical Center, Durham, North Carolina

<sup>4</sup>Center for Applied Therapeutics, Division of Surgical Sciences, Dept. of Surgery, Duke University Medical Center, Durham, North Carolina

<sup>5</sup>Department of Psychiatry and Behavioral Sciences, Duke University Medical Center, Durham, North Carolina

<sup>6</sup>Department of Pathology, Duke University Medical Center, Durham, North Carolina

**Table S1: PCR conditions:**

| Gene Name     | Forward Primer (5'→3')           | Reverse Primer (5'→3')        | Sequencing Primer (5'→3') | PCR Cycling Conditions*                                    |
|---------------|----------------------------------|-------------------------------|---------------------------|------------------------------------------------------------|
| <i>Shank1</i> | GATATTTGTAGGGTGTGGAATTTGAG       | BTN-AAACCCCAAACAAAACCTCCTC    | GGGTGTGGAATTTGAGA         | 94-63-72 x 55                                              |
| <i>Syt3</i>   | BTN-GAGGAAGAAGGGATTTGTTTAGTTT    | CTCTCACCAATCATAATCTACCACT     | ACCAATCATAATCTACCACT      | 94-64/61-72 x 5 at each annealing temp, then 94-58-72 x 55 |
| <i>Lrrtm4</i> | BTN-TGGATTTTTTTTATAATAAATTTTAGAT | ACTCCAATAAAACTCTTTCAACTT      | CAAAAAACCAACAAATACAT      | 94-64/61-72 x 5 at each annealing temp, then 94-58-72 x 55 |
| <i>Nrxn1</i>  | BTN-AGGTAGAATTTTGGTTTAGTTAG      | CTAATCAATCCCACAAAACATA        | CTAAAATTTCACAAACCT        | 94-62/60-72 x 5 at each annealing temp, then 94-58-72 x 55 |
| <i>Nrxn3</i>  | ATGTTAATTTGGTTTGAAGGATG          | BTN-TACCTAAAATAAACCTTCCAAACTC | GGTTTTTTGGTTATTA          | 94-62/60-72 x 5 at each annealing temp, then 94-58-72 x 55 |
| <i>Dlg4</i>   | GGTAATTGGGGAAGTTTTAGGATA         | BTN-TTTAAAACCCTCACCTATACAA    | AGGATAATTTAAAGTTGGT       | 94-63-72 x 55                                              |
| <i>Grid1</i>  | BTN-GTGTGTTGGTTGAAAAAGGATAT      | CAATTCATTACACCCCACTTAT        | CACACCACTTATCCC           | 94-64-72 x 55                                              |

\*All reactions were performed with a heated lid at 99 degrees. Reactions began at 95 degrees for 15 minutes. Following 30 seconds at each cycling temperature, samples were heated at 72 degrees for 10 minutes and then cooled at 4 degrees.

**Supplementary Table 2. Significant Biological Process GO terms for genes entered into the String database. Bolded GO terms are related to neuronal processes.**

| #term ID   | term description                   | observed gene count | background gene count | false discovery rate | matching proteins in your network (labels)                                                                                                                                                                                                                                                                                                                                                                                                                                                                                                                                                                                                                                                                                                                                                                                                                                                                                                                                                                                                                                                                                                                                                                                                                                                                                                   |
|------------|------------------------------------|---------------------|-----------------------|----------------------|----------------------------------------------------------------------------------------------------------------------------------------------------------------------------------------------------------------------------------------------------------------------------------------------------------------------------------------------------------------------------------------------------------------------------------------------------------------------------------------------------------------------------------------------------------------------------------------------------------------------------------------------------------------------------------------------------------------------------------------------------------------------------------------------------------------------------------------------------------------------------------------------------------------------------------------------------------------------------------------------------------------------------------------------------------------------------------------------------------------------------------------------------------------------------------------------------------------------------------------------------------------------------------------------------------------------------------------------|
| GO:0032502 | developmental process              | 137                 | 2616                  | 1.45E-11             | Adam15, Adora2a, Adra2c, Aldh1a3, Arf6, Arhgef28, Arb2, Atat1, Atp1a3, Axin2, Bcan, Bmp6, Brinp3, Bsn, Cabp1, Capn2, Capn3, Cbx7, Cdb8a, Cdc20, Cdh22, Cebpe, Celsr2, Celsr3, Chad, Chst11, Cln8, Crip1, Dapk3, Dbn1, Dgkg, Diexf, Dlg4, Dnmt3a, Dnmt3l, Dpf1, Dpysl5, Drc1, Dyx1c1, Elavl2, Ezf, Fat3, Fbxl15, Fcrla, Ffar2, Fgf14, Foxg1, Fzd9, Gata2, Gdf6, Gfi1, Gpr157, Grm4, Hgf, Hnf1a, Igsf9, Igsf9, Inpp1, Jak3, Kazn, Kcne2, Lfng, Limk2, Llg1, Mag, Map2k1, Mapt, Matk, Mical2, Mmp24, Msi1, Myc, Nell2, Ninj1, Nlc1, Nos3, Nr3c1, Nrg2, Nr3c1, Nrxn1, Ntrk2, Odf2, Pacsin1, Palm, Pax8, Pcsk4, Pcsk9, Phox2a, Pkm, Plec, Plod3, Pomk, Pou2f1, Ppp1cc, Ppp1r15a, Prcc2a, Psd, RGD1311558, Rab3a, Rasgrp1, Rbp4, Rere, Rita1, Rogdi, S1pr1, Scn5a, Sh3bp1, Sh3gl2, Shank1, Siah1, Slc25a4, Slc39a3, Sorbs2, Spred2, Src, Sstr2, Stim1, Stk24, Ston2, Synj2, Syt3, Tbx3, Tbx5, Tdrd7, Tgfb3, Tgfb2, Tox2, Trpm2, Ucp3, Unc13a, Unc5a, Uncx, Usp7, Vapa, Vegfb, Vwf, Zbtb42, Zfp37                                                                                                                                                                                                                                                                                                                                                   |
| GO:0030154 | cell differentiation               | 93                  | 1561                  | 5.85E-10             | Adam15, Adora2a, Adra2c, Arf6, Arhgef28, Bmp6, Brinp3, Capn2, Capn3, Cdb8a, Cdc20, Cebpe, Celsr2, Celsr3, Chst11, Cln8, Dapk3, Dbn1, Dgkg, Dlg4, Dnmt3a, Dnmt3l, Dpysl5, Dyx1c1, Elavl2, Ezf, Fcrla, Ffar2, Foxg1, Fzd9, Gata2, Gdf6, Gfi1, Gpr157, Grm4, Hgf, Igsf9, Inpp1, Jak3, Kazn, Lfng, Limk2, Llg1, Mag, Map2k1, Mapt, Matk, Mmp24, Msi1, Myc, Nlc1, Nr3c1, Nrxn1, Ntrk2, Odf2, Pacsin1, Pax8, Pcsk4, Pcsk9, Plec, Plod3, Pomk, Ppp1cc, Prcc2a, Psd, RGD1311558, Rab3a, Rasgrp1, Rere, Rita1, Rogdi, S1pr1, Sh3bp1, Sh3gl2, Shank1, Siah1, Sorbs2, Src, Stim1, Stk24, Ston2, Syt3, Tbx3, Tbx5, Tdrd7, Tgfb3, Tgfb2, Trpm2, Unc13a, Unc5a, Uncx, Vapa, Zfp37                                                                                                                                                                                                                                                                                                                                                                                                                                                                                                                                                                                                                                                                          |
| GO:0048869 | cellular developmental process     | 94                  | 1592                  | 5.85E-10             | Adam15, Adora2a, Adra2c, Arf6, Arhgef28, Bmp6, Brinp3, Capn2, Capn3, Cdb8a, Cdc20, Cebpe, Celsr2, Celsr3, Chst11, Cln8, Dapk3, Dbn1, Dgkg, Dlg4, Dnmt3a, Dnmt3l, Dpysl5, Dyx1c1, Elavl2, Ezf, Fcrla, Ffar2, Foxg1, Fzd9, Gata2, Gdf6, Gfi1, Gpr157, Grm4, Hgf, Igsf9, Inpp1, Jak3, Kazn, Lfng, Limk2, Llg1, Mag, Map2k1, Mapt, Matk, Mmp24, Msi1, Myc, Nlc1, Nr3c1, Nrxn1, Ntrk2, Odf2, Pacsin1, Pax8, Pcsk4, Pcsk9, Plec, Plod3, Pomk, Ppp1cc, Prcc2a, Psd, RGD1311558, Rab3a, Rasgrp1, Rere, Rita1, Rogdi, S1pr1, Sh3bp1, Sh3gl2, Shank1, Siah1, Slc25a4, Slc39a3, Sorbs2, Src, Stim1, Stk24, Ston2, Syt3, Tbx3, Tbx5, Tdrd7, Tgfb3, Tgfb2, Trpm2, Unc13a, Unc5a, Uncx, Vapa, Zfp37                                                                                                                                                                                                                                                                                                                                                                                                                                                                                                                                                                                                                                                        |
| GO:0048856 | anatomical structure development   | 122                 | 2396                  | 1.17E-09             | Adam15, Adora2a, Adra2c, Aldh1a3, Arf6, Arb2, Atat1, Atp1a3, Axin2, Bcan, Bmp6, Brinp3, Bsn, Cabp1, Capn2, Capn3, Cbx7, Cdb8a, Cdc20, Cdh22, Cebpe, Celsr2, Celsr3, Chad, Chst11, Cln8, Crip1, Dapk3, Dbn1, Dgkg, Diexf, Dlg4, Dnmt3a, Dpf1, Dpysl5, Drc1, Dyx1c1, Elavl2, Ezf, Fat3, Fbxl15, Fgf14, Foxg1, Fzd9, Gata2, Gdf6, Gfi1, Gpr157, Grm4, Hgf, Hnf1a, Igsf9, Inpp1, Jak3, Kazn, Kcne2, Lfng, Limk2, Llg1, Mag, Map2k1, Mapt, Mical2, Mmp24, Msi1, Myc, Ninj1, Nlc1, Nos3, Nr3c1, Nrg2, Nrxn1, Ntrk2, Odf2, Pacsin1, Palm, Pax8, Pcsk4, Pcsk9, Pkm, Plec, Plod3, Pomk, Pou2f1, Ppp1cc, Psd, RGD1311558, Rab3a, Rbp4, Rere, Rita1, Rogdi, S1pr1, Scn5a, Sh3bp1, Sh3gl2, Shank1, Siah1, Slc25a4, Slc39a3, Sorbs2, Spred2, Src, Sstr2, Stim1, Stk24, Ston2, Synj2, Tbx3, Tbx5, Tdrd7, Tgfb3, Tgfb2, Tox2, Trpm2, Unc5a, Uncx, Usp7, Vapa, Vegfb, Vwf, Zbtb42                                                                                                                                                                                                                                                                                                                                                                                                                                                                            |
| GO:0007275 | multicellular organism development | 116                 | 2257                  | 2.19E-09             | Adam15, Adora2a, Adra2c, Aldh1a3, Arf6, Arb2, Atat1, Atp1a3, Axin2, Bcan, Bmp6, Brinp3, Bsn, Cabp1, Capn2, Cbx7, Cdb8a, Cdc20, Cdh22, Cebpe, Celsr2, Celsr3, Chad, Chst11, Cln8, Crip1, Dapk3, Dbn1, Dgkg, Diexf, Dlg4, Dnmt3a, Dpf1, Dpysl5, Drc1, Dyx1c1, Elavl2, Fat3, Fbxl15, Fgf14, Foxg1, Fzd9, Gata2, Gdf6, Gfi1, Gpr157, Grm4, Hgf, Hnf1a, Igsf9, Inpp1, Jak3, Kazn, Kcne2, Lfng, Limk2, Llg1, Mag, Map2k1, Mapt, Mical2, Mmp24, Myc, Ninj1, Nlc1, Nos3, Nr3c1, Nrg2, Nrxn1, Ntrk2, Odf2, Pacsin1, Palm, Pax8, Pcsk4, Pcsk9, Pkm, Plec, Plod3, Pomk, Pou2f1, Ppp1cc, Psd, RGD1311558, Rab3a, Rbp4, Rere, Rita1, Rogdi, S1pr1, Scn5a, Sh3gl2, Shank1, Slc25a4, Slc39a3, Sorbs2, Spred2, Src, Sstr2, Stim1, Stk24, Ston2, Synj2, Tbx3, Tbx5, Tdrd7, Tgfb3, Tgfb2, Tox2, Trpm2, Unc5a, Uncx, Usp7, Vapa, Vegfb, Vwf, Zbtb42                                                                                                                                                                                                                                                                                                                                                                                                                                                                                                             |
| GO:0048731 | system development                 | 107                 | 2034                  | 4.15E-09             | Adam15, Adora2a, Adra2c, Aldh1a3, Arf6, Arb2, Atat1, Atp1a3, Bcan, Bmp6, Brinp3, Bsn, Cbx7, Cdb8a, Cdc20, Cdh22, Cebpe, Celsr2, Celsr3, Chad, Chst11, Cln8, Crip1, Dapk3, Dbn1, Dgkg, Diexf, Dlg4, Dnmt3a, Dnmt3l, Dpf1, Dpysl5, Drc1, Dyx1c1, Elavl2, Ezf, Fam129b, Fat3, Fbxl15, Fgf12, Fgf14, Foxg1, Fzd9, Gata2, Gdf6, Gfi1, Gjd2, Gpr157, Grid1, Grik3, Grm4, Hgf, Hnf1a, Igsf9, Inpp1, Jak3, Kazn, Kcne2, Kcnmb4, Lfng, Limk2, Llg1, Mag, Map2k1, Mapt, Mical2, Mmp24, Myc, Ninj1, Nlc1, Nos3, Nr3c1, Nrg2, Nrxn1, Ntrk2, Odf2, Pacsin1, Palm, Pax8, Pcsk4, Pcsk9, Pgc, Pkm, Plec, Plod3, Pomk, Pou2f1, Ppp1cc, Prkaca, Psd, RGD1311558, Rab3a, Rasgrp1, Rbp4, Rere, Rita1, Rogdi, S1pr1, Scamp4, Scn5a, Sh3gl2, Shank1, Siah1, Slc25a4, Slc39a3, Sorbs2, Spred2, Src, Sstr2, Stim1, Stk24, Ston2, Synj2, Tbx3, Tbx5, Tdrd7, Tgfb3, Tgfb2, Tox2, Trpm6, Trpm2, Unc5a, Uncx, Usp7, Vapa, Vegfb, Vwf, Zbtb42                                                                                                                                                                                                                                                                                                                                                                                                                             |
| GO:0032501 | multicellular organismal process   | 137                 | 2936                  | 8.51E-09             | Adam15, Adora2a, Adra2c, Aldh1a3, Arf6, Arb2, Atat1, Atp1a3, Avp, Axin2, B4galnt1, Bcan, Bmp6, Brinp3, Bsn, Cabp1, Cacna1a, Cacna1g, Cacna1i, Capn2, Cbx7, Cdb8a, Cdc20, Cdh22, Cebpe, Celsr2, Celsr3, Chad, Chst11, Cln8, Crip1, Dapk3, Dbn1, Dgkg, Diexf, Dlg4, Dnmt3a, Dnmt3l, Dpf1, Dpysl5, Drc1, Dyx1c1, Elavl2, Ezf, Fam129b, Fat3, Fbxl15, Fgf12, Fgf14, Foxg1, Fzd9, Gata2, Gdf6, Gfi1, Gjd2, Gpr157, Grid1, Grik3, Grm4, Hgf, Hnf1a, Igsf9, Inpp1, Jak3, Kazn, Kcne2, Kcnmb4, Lfng, Limk2, Llg1, Mag, Map2k1, Mapt, Mical2, Mmp24, Myc, Ninj1, Nlc1, Nos3, Nr3c1, Nrg2, Nrxn1, Ntrk2, Odf2, Pacsin1, Palm, Pax8, Pcsk4, Pcsk9, Pgc, Pkm, Plec, Plod3, Pomk, Pou2f1, Ppp1cc, Prkaca, Psd, RGD1311558, Rab3a, Rasgrp1, Rbp4, Rere, Rita1, Rogdi, S1pr1, Scamp4, Scn5a, Sh3gl2, Shank1, Siah1, Slc25a4, Slc39a3, Sorbs2, Spred2, Src, Sstr2, Stim1, Stk24, Ston2, Synj2, Tbx3, Tbx5, Tdrd7, Tgfb3, Tgfb2, Tox2, Trim6, Trpm2, Unc5a, Uncx, Usp7, Vapa, Vegfb, Vwf, Zbtb42                                                                                                                                                                                                                                                                                                                                                              |
| GO:0050789 | regulation of biological process   | 184                 | 4461                  | 2.32E-08             | Acs15, Adam15, Adk, Adora2a, Adra2c, Ank3, Anp32b, Arf6, Arhgap27, Arhgef28, Arpc1a, Arb2, Atat1, Atp1a3, Avp, Axin2, Bcan, Bmp6, Bop1, Brinp3, C4a, Cabp1, Cacna1a, Cacna1g, Cacna1i, Cacna2d1, Cacna2d2, Capn2, Capn3, Cbx7, Ccdc80, Cdb8a, Cdc20, Cebpe, Celsr2, Celsr3, Chad, Chd6, Chst11, Cln8, Crip1, Csd2, Csnk1g2, Dapk3, Dbn1, Dgkg, Dkc1, Dlg4, Dnmt3a, Dnmt3l, Dok3, Dpf1, Dyrk3, Dyx1c1, ENSRNOG00000050782, Elavl2, Ezf, Fam129b, Fbxl15, Ffar2, Fgf12, Fgf14, Fgfr4, Fkbp1, Foxg1, Fto, Fzd9, Galr3, Gata2, Gdf6, Gfi1, Gnb2, Gng7, Gpr157, Gpr6, Grasp, Grb7, Grid1, Grik3, Grina, Grm4, Hgf, Hipk4, Hnf1a, Igsf9, Igsf9, Inpp1, Itp3, Jak3, Kcne2, Kcng1, Kcnp1, Kcnp4, Kcnj4, Kdm8, Lfng, Limk2, Llg1, Lrrtm4, Lzts2, Mag, Map2k1, Mapt, Masp1, Matk, Mbnl2, Mefv, Mical2, Myc, Nell2, Nfe2, Ninj1, Nlc1, Nos3, Nr3c1, Nrg2, Nrxn1, Ntrk2, Oas1, Pacsin1, Palm, Pax8, Pcsk9, Pgc, Phox2a, Pif1, Pla2g1b, Pomt1, Por, Pou2f1, Ppp1cc, Ppp1r14a, Ppp1r15a, Prkaca, Psd, RGD1311558, Rab3a, Rasgrp1, Rassf9, Rbp4, Rere, Rita1, Rnf187, Rogdi, S1pr1, Sbn1, Scn5a, Sh3bp1, Sh3gl2, Sh3rf2, Shank1, Siah1, Slc15a1, Slc25a4, Spred2, Src, Sstr2, Stim1, Stk24, Ston2, Stpg1, Syt3, Taf6, Tbx3, Tbx5, Tdrd7, Tes, Tgfb3, Tgfb2, Tle3, Tox2, Trim63, Trpm2, Tsks, Unc13a, Unc5a, Uncx, Usp7, Vegfb, Zbtb42, Zbtb8a, Zfp37, Zfp90 |

|            |                                           |     |      |          |                                                                                                                                                                                                                                                                                                                                                                                                                                                                                                                                                                                                                                                                                                                                                                                                                                                                                                                                                                                                                                                                                                                                                                                                                                                                                                                                                                                                                         |
|------------|-------------------------------------------|-----|------|----------|-------------------------------------------------------------------------------------------------------------------------------------------------------------------------------------------------------------------------------------------------------------------------------------------------------------------------------------------------------------------------------------------------------------------------------------------------------------------------------------------------------------------------------------------------------------------------------------------------------------------------------------------------------------------------------------------------------------------------------------------------------------------------------------------------------------------------------------------------------------------------------------------------------------------------------------------------------------------------------------------------------------------------------------------------------------------------------------------------------------------------------------------------------------------------------------------------------------------------------------------------------------------------------------------------------------------------------------------------------------------------------------------------------------------------|
| GO:0065007 | biological regulation                     | 192 | 4801 | 8.41E-08 | Acsf5,Adam15,Adk,Adora2a,Adra2c,Aldh1a3,Ank3,Anp32b,Arf6,Arhgap27,Arhgef28,Arpc1a,Arb2,Atat1,Atp1a3,Avp,Axin2,B4galnt1,Bcan,Bmp6,Bop1,Brinp3,C4a,Cabp1,Cacna1g,Cacna1i,Cacna2d1,Cacna2d2,Capn2,Capn3,Cbx7,Ccdc80,Cd8a,Cdc20,Cebpe,Celsr2,Celsr3,Chad,Chd6,Chst11,Cln8,Crip1,Csdc2,Csnk1g2,Dapk3,Dbn1,Dgkg,Dkc1,Dlg4,Dnmt3a,Dnmt3l,Dok3,Dpf1,Dyrk3,Dyx1c1,ENSRNOG00000050782,Elavl2,Ezr,Fam129b,Fbxl15,Ffar2,Fgf12,Fgf14,Fgfr4,Fkbp1,Foxg1,Fto,Fzd9,Galr3,Gata2,Gdf6,Gfi1,Gjd2,Gnb2,Gng7,Gpr157,Gpr6,Grasp,Grb7,Grid1,Grik3,Grina,Grm4,Hgf,Hipk4,Hnf1a,Igfbp6,Igfsf9,Inpp1,Itp3,Jak3,Kcne2,Kcng1,Kcnp1,Kcnp4,Kcnj4,Kcnk1,Kcnmb4,Kdm8,Lfng,Limk2,Llg1,Lrrtm4,Lzts2,Map2k1,Mapt,Masp1,Matk,Mbnl2,Mefv,Mical2,Myc,Nell2,Nfe2,Ninj1,Nolc1,Nos3,Nr3c1,Nrg2,Nrxn1,Ntrk2,Oasl,Pacsin1,Palm,Pax8,Pcsk9,Pgc,Phox2a,Pif1,Pla2g1b,Plod3,Pom1,Por,Pou2f1,Ppfia3,Ppp1cc,Ppp1r14a,Ppp1r15a,Prkaca,Psd,RGD1311558,Rab3a,Rasgrp1,Rassf9,Rbp4,Rere,Rita1,Rnf187,Rogdi,S1pr1,Sbno1,Scn5a,Sh3bp1,Sh3gl2,Sh3rf2,Shank1,Siah1,Slc15a1,Slc25a4,Slc39a3,Spred2,Src,Sstr2,Stim1,Stk24,Ston2,Stpg1,Syt3,Taf6,Tbx3,Tbx5,Tdrd7,Tes,Tgfb3,Tgfb2,Tle3,Tox2,Trim63,Trpm2,Tsks,Unc13a,Unc5a,Uncx,Usp7,Vegfb,Vwf,Zbtb42,Zbtb8a,Zfp37,Zfp90                                                                                                                                                                                                               |
| GO:0007399 | nervous system development                | 71  | 1219 | 2.50E-07 | Adora2a,Adra2c,Aldh1a3,Arf6,Arb2,Atat1,Atp1a3,Bcan,Bmp6,Brinp3,Bsn,Cdc20,Cdh22,Celsr2,Celsr3,Cln8,Dapk3,Dbn1,Dgkg,Dlg4,Dnmt3a,Dpf1,Dpys15,Dyx1c1,Elavl2,Fgf14,Foxg1,Fzd9,Gata2,Gdf6,Gfi1,Gpr157,Grm4,Hgf,Igfsf9,Inpp1,Llg1,Mag,Map2k1,Mapt,Mmp24,Myc,Nr3c1,Nrxn1,Ntrk2,Pacsin1,Palm,Pax8,Pcsk9,Plod3,Pomk,Ppp1cc,Psd,RGD1311558,Rab3a,Rere,Rita1,Rogdi,S1pr1,Scn5a,Sh3gl2,Shank1,Src,Sstr2,Stk24,Synj2,Tbx3,Tgfb2,Unc5a,Uncx,Vapa                                                                                                                                                                                                                                                                                                                                                                                                                                                                                                                                                                                                                                                                                                                                                                                                                                                                                                                                                                                       |
| GO:0009987 | cellular process                          | 226 | 6022 | 2.50E-07 | Abcd2,Acsf2,Acsf5,Actn1,Adam15,Adk,Adora2a,Adra2c,Aldh1a3,Ank3,Anp32b,Arf6,Arhgap27,Arhgef28,Arpc1a,Arb2,Atat1,Atp1a3,Avp,Axin2,B4galnt1,B4galnt4,Bet1,Bmp6,Bop1,Brinp3,Bsn,Cacna1g,Cacna1i,Cacna2d1,Capn2,Capn3,Cbx7,Ccdc80,Cd8a,Cdc20,Cebpe,Celsr2,Celsr3,Chad,Chd6,Chst11,Cln8,Clns2,Crip1,Csdc2,Csnk1g2,Cyb5a,Dapk3,Dbn1,Dgkg,Diexf,Dkc1,Dlg4,Dnmt3a,Dnmt3l,Dok3,Dpf1,Dpys15,Drc1,Dyrk3,Dyx1c1,ENSRNOG00000050782,Elavl2,Ezr,Fam129b,Fbxl15,Fcrla,Ffar2,Fgf12,Fgfr4,Foxg1,Fto,Fzd9,Galr3,Gata2,Gdf6,Gfi1,Gjd2,Gnb2,Gng7,Gpr157,Gpr6,Grasp,Grb7,Grid1,Grik3,Grina,Grm4,Gypc,Haf,Hgf,Hipk4,Hnf1a,Igfbp6,Igfsf9,Inpp1,Itp3,Jak3,Kazn,Kcne2,Kcng1,Kcnp1,Kcnp4,Kcnj4,Kcnk1,Kcnmb4,Kdm8,Lfng,Limk2,Llg1,Lrrtm4,Lzts2,Map2k1,Mapre2,Mapt,Matk,Mbnl2,Mical2,Mmp24,Msi1,Msrb2,Mtr,Myc,Nell2,Nfe2,Nmnat2,Nolc1,Nos3,Nr3c1,Nrg2,Nrxn1,Ntrk2,Odf2,Oplah,Pacsin1,Palm,Pax8,Pcsk4,Pcsk9,Pcyt2,Pgc,Phox2a,Pif1,Pip5k1c,Pkm,Pla2g1b,Plec,Plod1,Plod3,Pomk,Pomt1,Por,Pou2f1,Ppfia3,Ppp1cc,Ppp1r14a,Ppp1r15a,Prkaca,Prrc2a,Psd,Qtrt1,RGD1311558,RGD1559696,Rab31,Rab3a,Rasgrp1,Rassf9,Rbp4,Repin1,Rere,Rita1,Rnf182,Rnf187,Rnf44,Rogdi,Rpl35a,Rtn3,S1pr1,Scn5a,Sh3bp1,Sh3gl2,Sh3rf2,Shank1,Siah1,Slc25a4,Slc39a3,Sorbs2,Src,Sstr2,Stim1,Ston2,Stpg1,Synj2,Syt3,Taf6,Tbx3,Tbx5,Tdrd7,Tgfb3,Tgfb2,Tle3,Tmem14c,Tox2,Tppp3,Trim63,Ttrm11,Trpm2,Tubb5,U2af1f4,Ucp3,Unc13a,Unc5a,Uncx,Usp7,Vapa,Vegfb,Vwf,Zbtb42,Zbtb8a,Zdhc22,Zfp37,Zfp90 |
| GO:0050794 | regulation of cellular process            | 169 | 4191 | 7.73E-07 | Acsf5,Adam15,Adk,Adora2a,Adra2c,Ank3,Anp32b,Arf6,Arhgap27,Arhgef28,Arpc1a,Arb2,Atat1,Atp1a3,Avp,Axin2,Bcan,Bmp6,Bop1,Brinp3,C4a,Cabp1,Cacna1g,Cacna1i,Capn2,Capn3,Cbx7,Cd8a,Cdc20,Cebpe,Celsr2,Celsr3,Chad,Chd6,Chst11,Cln8,Crip1,Csdc2,Csnk1g2,Dapk3,Dbn1,Dgkg,Dkc1,Dlg4,Dnmt3a,Dnmt3l,Dok3,Dpf1,Dyrk3,Dyx1c1,ENSRNOG00000050782,Elavl2,Ezr,Fam129b,Fbxl15,Ffar2,Fgf12,Fgf14,Fgfr4,Foxg1,Fzd9,Galr3,Gata2,Gdf6,Gfi1,Gnb2,Gng7,Gpr157,Gpr6,Grasp,Grb7,Grid1,Grik3,Grina,Grm4,Hgf,Hipk4,Hnf1a,Igfbp6,Igfsf9,Inpp1,Itp3,Jak3,Kcne2,Kcng1,Kcnp1,Kcnp4,Kcnj4,Kcnk1,Kcnmb4,Kdm8,Lfng,Limk2,Llg1,Lrrtm4,Lzts2,Map2k1,Mapt,Matk,Mbnl2,Mefv,Mical2,Myc,Nell2,Nfe2,Nolc1,Nos3,Nr3c1,Nrg2,Nrxn1,Ntrk2,Pacsin1,Palm,Pax8,Pcsk9,Phox2a,Pif1,Pla2g1b,Pomt1,Por,Pou2f1,Ppfia3,Ppp1cc,Ppp1r14a,Ppp1r15a,Prkaca,Psd,RGD1311558,Rab3a,Rasgrp1,Rassf9,Rbp4,Rere,Rita1,Rnf187,Rogdi,S1pr1,Sbno1,Scn5a,Sh3bp1,Sh3gl2,Sh3rf2,Shank1,Siah1,Slc25a4,Spred2,Src,Sstr2,Stk24,Ston2,Stpg1,Syt3,Taf6,Tbx3,Tbx5,Tes,Tgfb3,Tgfb2,Tle3,Tox2,Trpm2,Tsks,Unc13a,Unc5a,Uncx,Usp7,Vegfb,Zbtb42,Zbtb8a,Zfp37,Zfp90                                                                                                                                                                                                                                                                                                                                         |
| GO:0009653 | anatomical structure morphogenesis        | 48  | 734  | 5.55E-06 | Adam15,Adora2a,Bmp6,Capn2,Capn3,Celsr2,Celsr3,Chad,Chst11,Crip1,Dlg4,Dpys15,Foxg1,Gata2,Hgf,Hnf1a,Inpp1,Lfng,Llg1,Map2k1,Mical2,Myc,Ninj1,Nolc1,Nrxn1,Pacsin1,Pax8,Plod3,RGD1311558,Rab3a,Rere,Rogdi,S1pr1,Scn5a,Sh3bp1,Sh3gl2,Shank1,Slc39a3,Src,Stim1,Stk24,Tbx3,Tbx5,Tdrd7,Tgfb3,Tgfb2,Unc5a,Vegfb                                                                                                                                                                                                                                                                                                                                                                                                                                                                                                                                                                                                                                                                                                                                                                                                                                                                                                                                                                                                                                                                                                                   |
| GO:0022008 | neurogenesis                              | 51  | 839  | 1.66E-05 | Adora2a,Adra2c,Arf6,Bmp6,Brinp3,Cdc20,Celsr2,Celsr3,Cln8,Dapk3,Dbn1,Dgkg,Dlg4,Dnmt3a,Dpys15,Dyx1c1,Elavl2,Fzd9,Gata2,Gdf6,Gfi1,Gpr157,Grm4,Hgf,Igfsf9,Inpp1,Llg1,Mag,Map2k1,Mapt,Mmp24,Myc,Nr3c1,Nrxn1,Ntrk2,Pacsin1,Pcsk9,Pomk,Ppp1cc,Psd,RGD1311558,Rab3a,Rere,Rita1,Rogdi,S1pr1,Sh3gl2,Shank1,Stk24,Unc5a,Vapa                                                                                                                                                                                                                                                                                                                                                                                                                                                                                                                                                                                                                                                                                                                                                                                                                                                                                                                                                                                                                                                                                                       |
| GO:0051179 | localization                              | 101 | 2237 | 1.74E-05 | Abcd2,Acsf5,Ank3,Anks1b,Anp32b,Anxa6,Arf6,Arhgap27,Arb2,Asic4,Atp1a3,B4galnt1,Bet1,Bsn,Cacna1g,Cacna1i,Cacna2d1,Cacna2d2,Capn3,Cebpe,Celsr3,Chst11,Cln8,Csnk1g2,Dlg4,Drc1,Dyx1c1,Ezr,Fam129b,Ffar2,Fgf14,Gata2,Grasp,Grid1,Grik3,Grina,Grm4,Hare,Hgf,Hnf1a,Itp3,Jak3,Kcne2,Kcng1,Kcnp1,Kcnp4,Kcnj4,Kcnk1,Kcnmb4,Klcl,Llg1,Map2k1,Myc,Nrxn1,Ntrk2,Odf2,Pacsin1,Palm,Pcsk9,Pip5k1c,Pla2g1b,Plod3,Pomk,Ppfia3,Psd,RGD1311558,RGD1559696,Rab31,Rab3a,Rasgrp1,Rassf9,Rbp4,Rere,Rita1,Rtn3,S1pr1,Scamp4,Scn5a,Sh3bp1,Sh3gl2,Shank1,Slc10a4,Slc15a1,Slc25a4,Slc39a3,Slc3a2,Src,Stim1,Ston2,Stpg1,Svop,Synj2,Syt3,Tbx3,Tbx5,Tgfb3,Tgfb2,Trpm2,Ucp3,Unc13a,Vapa,Zdhc22                                                                                                                                                                                                                                                                                                                                                                                                                                                                                                                                                                                                                                                                                                                                                           |
| GO:0048518 | positive regulation of biological process | 107 | 2425 | 1.88E-05 | Acsf5,Adk,Adora2a,Adra2c,Ank3,Anp32b,Arf6,Arpc1a,Arb2,Atat1,Avp,Axin2,Bmp6,Brinp3,C4a,Cacna1g,Cacna1i,Cacna2d1,Capn3,Cbx7,Ccdc80,Cdc20,Cebpe,Chd6,Dapk3,Dbn1,Dkc1,Dlg4,Dnmt3a,Dnmt3l,Elavl2,Ezr,Fam129b,Fbxl15,Ffar2,Fgf12,Fgf14,Fgfr4,Fzd9,Galr3,Gata2,Gdf6,Gfi1,Grb7,Hgf,Hnf1a,Jak3,Kcne2,Kcnp1,Kdm8,Lfng,Lzts2,Map2k1,Mapt,Masp1,Mefv,Mical2,Myc,Nell2,Nfe2,Ninj1,Nolc1,Nos3,Nr3c1,Nrxn1,Ntrk2,Pacsin1,Palm,Pax8,Pcsk9,Pgc,Phox2a,Pla2g1b,Pomt1,Por,Ppp1cc,Ppp1r15a,Prkaca,RGD1311558,Rab3a,Rasgrp1,Rbp4,Rere,Rnf187,Rogdi,S1pr1,Scn5a,Sh3bp1,Sh3gl2,Shank1,Siah1,Slc25a4,Src,Stim1,Stk24,Stpg1,Syt3,Tbx3,Tbx5,Tgfb3,Tgfb2,Tox2,Trpm2,Unc13a,Usp7,Vegfb,Zfp90                                                                                                                                                                                                                                                                                                                                                                                                                                                                                                                                                                                                                                                                                                                                                        |
| GO:0048699 | generation of neurons                     | 47  | 781  | 6.07E-05 | Adora2a,Adra2c,Arf6,Bmp6,Brinp3,Cdc20,Celsr2,Celsr3,Cln8,Dapk3,Dbn1,Dgkg,Dlg4,Dnmt3a,Dpys15,Dyx1c1,Elavl2,Fzd9,Gata2,Gdf6,Gfi1,Grm4,Hgf,Igfsf9,Inpp1,Llg1,Mag,Map2k1,Mapt,Myc,Nr3c1,Nrxn1,Ntrk2,Pacsin1,Pcsk9,Pomk,Ppp1cc,Psd,RGD1311558,Rab3a,Rere,S1pr1,Sh3gl2,Shank1,Stk24,Unc5a,Vapa                                                                                                                                                                                                                                                                                                                                                                                                                                                                                                                                                                                                                                                                                                                                                                                                                                                                                                                                                                                                                                                                                                                                |
| GO:0050896 | response to stimulus                      | 142 | 3604 | 6.44E-05 | Acsf5,Adam15,Adora2a,Adra2c,Aldh1a3,Ank3,Arhgap27,Arhgef28,Arb2,Atp1a3,Avp,Axin2,Bmp6,Brinp3,C4a,Cabp1,Cacna1g,Capn2,Capn3,Car5b,Cbx7,Ccdc80,Cd8a,Cebpe,Celsr2,Celsr3,Chad,Chd6,Cln8,Crip1,Csnk1g2,Cyb5a,Dapk3,Dbn1,Dgkg,Dnmt3a,Dnmt3l,Dok3,Dpys15,ENSRNOG00000050782,Elavl2,Ezr,Far2,Fgf12,Fgfr4,Fto,Fzd9,Galr3,Gata2,Gdf6,Gfi1,Gnb2,Gng7,Gpr157,Gpr6,Grasp,Grb7,Grid1,Grik3,Grm4,Hare,Hgf,Hnf1a,Igfbp6,Igfsf9,Inpp1,Itp3,Jak3,Kcne2,Kcnp1,Kcnj4,Kcnk1,Kcnmb4,Lfng,Limk2,Lrrtm4,Lzts2,Map2k1,Mapt,Masp1,Matk,Mefv,Mmp24,Msi1,Msrb2,Mtr,Myc,Ninj1,Nlx1,Nolc1,Nos3,Nr3c1,Nrg2,Nrxn1,Ntrk2,Oasl,Palm,Pax8,Pcsk9,Pif1,Pip5k1c,Pkm,Pla2g1b,Plec,Plod1,Plod3,Pomt1,Por,Ppp1cc,Ppp1r14a,Ppp1r15a,Prkaca,RGD1311558,Rab31,Rab3a,Rasgrp1,Rassf9,Rbp4,Rita1,S1pr1,Scn5a,Sh3bp1,Sh3gl2,Shank1,Slc25a4,Src,Sstr2,Stim1,Stk24,Syt3,Tbx3,Tgfb3,Tgfb2,Tle3,Tox2,Trim63,Trpm2,Ucp3,Unc13a,Unc5a,Usp7,Vegfb,Vwf                                                                                                                                                                                                                                                                                                                                                                                                                                                                                                                         |

|            |                                              |     |      |          |                                                                                                                                                                                                                                                                                                                                                                                                                                                                                                                                                                                                                                                                           |
|------------|----------------------------------------------|-----|------|----------|---------------------------------------------------------------------------------------------------------------------------------------------------------------------------------------------------------------------------------------------------------------------------------------------------------------------------------------------------------------------------------------------------------------------------------------------------------------------------------------------------------------------------------------------------------------------------------------------------------------------------------------------------------------------------|
| GO:0048522 | positive regulation of cellular process      | 97  | 2201 | 7.71E-05 | Acs15,Adk,Adora2a,Adra2c,Ank3,Anp32b,Arf6,Arpc1a,Arreb2,Atat1,Avp,Axin2,Bmp6,Brinp3,Cacna1g,Cacna1i,Capn3,Cbx7,Cdc20,Cebpe,Chd6,Dapk3,Dbn1,Dkc1,Dlg4,Dnmt3a,Dnmt3l,Elavl2,Ezr,Fam129b,Fbxl15,Ffar2,Fgfr4,Fzd9,Galr3,Gata2,Gdf6,Gfi1,Grb7,Hgf,Hnf1a,Jak3,Kcne2,Kdm8,Lfng,Lzts2,Mag,Map2k1,Mapt,Mefv,Mical2,Myc,Nell2,Nfe2,Nolc1,Nos3,Nr3c1,Nrxn1,Ntrk2,Pacsin1,Palm,Pax8,Pcsk9,Phox2a,Pla2g1b,Pomt1,Por,Ppp1cc,Ppp1r15a,Prkaca,RGD1311558,Rab3a,Rasgrp1,Rbp4,Rere,Rnf187,Rogdi,S1pr1,Scn5a,Sh3gl2,Shank1,Siah1,Slc25a4,Src,Stk24,Stpg1,Syt3,Tbx3,Tbx5,Tgfb3,Tgfb2,Tox2,Trpm2,Unc13a,Usp7,Vegfb,Zfp90                                                                       |
| GO:0032879 | regulation of localization                   | 68  | 1378 | 0.00013  | Acs15,Adam15,Adora2a,Ank3,Arf6,Arreb2,Avp,Bmp6,Cabp1,Cacna1a,Cacna1g,Cacna1i,Cacna2d1,Cacna2d2,Capn3,Celsr3,Dapk3,Dbn1,Dlg4,Ezr,Ffar2,Fgfr4,Fgf12,Fgf14,Fzd9,Gata2,Grb7,Hgf,Hnf1a,Itrp3,Jak3,Kcne2,Kcng1,Kcnp1,Kcnp4,Kcnp4,Lgl1,Map2k1,Myc,Nell2,Nolc1,Nr3c1,Nrxn1,Ntrk2,Pacsin1,Pax8,Pcsk9,Pla2g1b,Ppp1cc,RGD1311558,Rab3a,Rasgrp1,Rbp4,S1pr1,Scn5a,Sh3gl2,Shank1,Slc15a1,Slc25a4,Src,Stim1,Stk24,Ston2,Syt3,Tbx5,Tgfb3,Tgfb2,Trpm2,Vegfb                                                                                                                                                                                                                                |
| GO:0065009 | regulation of molecular function             | 71  | 1462 | 0.00013  | Adam15,Adora2a,Adra2c,Ank3,Anp32b,Arhgap27,Arhgef28,Arreb2,Avp,Axin2,Bmp6,C4a,Cabp1,Cacna1a,Cacna2d1,Cacna2d2,Capn3,Cdc20,Chad,Dbn1,Dlg4,Dnmt3l,Fam129b,Fgf12,Fgf14,Fgfr4,Galr3,Gdf6,Gfi1,Gnb2,Hgf,Ipp1l,Kcne2,Kcng1,Kcnp1,Kcnp4,Kcnmb4,Lfng,Lgl1,Lrrtm4,Map2k1,Myc,Nos3,Nrg2,Nrxn1,Ntrk2,Palm,Pcsk9,Pif1,Por,Ppp1r14a,Psd,Rab3a,Rasgrp1,S1pr1,Sh3bp1,Sh3f2,Shank1,Slc15a1,Slc25a4,Src,Stim1,Stk24,Stpg1,Taf6,Tgfb3,Tgfb2,Tsks,Usp7,Vegfb,Zfp90                                                                                                                                                                                                                           |
| GO:0048513 | animal organ development                     | 69  | 1420 | 0.00017  | Adam15,Aldh1a3,Arf6,Arreb2,Atat1,Atp1a3,Bmp6,Cbx7,Cd8a,Cdh22,Cebpe,Chad,Chst11,Cln8,Crip1,Dbn1,Drc1,Fbxl15,Foxg1,Fzd9,Gata2,Gfi1,Hgf,Hnf1a,Ipp1l,Jak3,Kazn,Kcne2,Lfng,Limk2,Mapt,Mical2,Myc,Ninj1,Nolc1,Nos3,Nr3c1,Nrg2,Nrxn1,Ntrk2,Pax8,Pcsk9,Pkm,Plod3,Pomk,Pou2f1,Rab3a,Rbp4,Rere,Rogdi,S1pr1,Scn5a,Slc25a4,Slc39a3,Sorbs2,Src,Sstr2,Stim1,Ston2,Synj2,Tbx3,Tbx5,Tdrd7,Tgfb3,Tgfb2,Tox2,Trpm2,Vwf,Zbtb42                                                                                                                                                                                                                                                               |
| GO:0010646 | regulation of cell communication             | 70  | 1486 | 0.00039  | Adora2a,Adra2c,Ank3,Arf6,Arhgef28,Arreb2,Avp,Axin2,Bcan,Bmp6,Bop1,Cabp1,Capn3,Cdc20,Chad,Chst11,Dapk3,Dbn1,Dlg4,Dyrk3,Dyx1c1,Ezr,Fbxl15,Ffar2,Fgf12,Fgf14,Fgfr4,Fzd9,Gata2,Gdf6,Gfi1,Grb7,Grik3,Grina,Grm4,Hgf,Hipk4,Hnf1a,Igfbp6,Ipp1l,Lfng,Lrrtm4,Map2k1,Mapt,Nell2,Nr3c1,Nrg2,Nrxn1,Ntrk2,Palm,Pax8,Pcsk9,Por,Ppfia3,Prkaca,Psd,Rab3a,Rasgrp1,Rbp4,Rita1,Sh3bp1,Shank1,Siah1,Spred2,Src,Stk24,Tgfb3,Trpm2,Unc13a,Vegfb                                                                                                                                                                                                                                                 |
| GO:0051049 | regulation of transport                      | 54  | 1043 | 0.00046  | Acs15,Adora2a,Ank3,Arreb2,Avp,Bmp6,Cabp1,Cacna1a,Cacna1g,Cacna1i,Cacna2d1,Cacna2d2,Capn3,Dbn1,Dlg4,Ezr,Ffar2,Fgf12,Fgf14,Gata2,Hnf1a,Jak3,Kcne2,Kcng1,Kcnp1,Kcnp4,Kcnp4,Lgl1,Map2k1,Myc,Nell2,Nolc1,Nr3c1,Nrxn1,Ntrk2,Pacsin1,Pax8,Pcsk9,Pla2g1b,Ppp1cc,Rab3a,Rasgrp1,Rbp4,Scn5a,Sh3gl2,Shank1,Slc15a1,Slc25a4,Src,Stim1,Ston2,Syt3,Tgfb3,Trpm2                                                                                                                                                                                                                                                                                                                           |
| GO:0030182 | neuron differentiation                       | 31  | 460  | 0.00057  | Adora2a,Celsr2,Celsr3,Cln8,Dapk3,Dgk,Dlg4,Dnmt3a,Dpys15,Elavl2,Gata2,Grm4,Igfsf9,Lgl1,Map2k1,Mapt,Nrxn1,Ntrk2,Pacsin1,Pcsk9,Ppp1cc,Psd,RGD1311558,Rab3a,Rere,S1pr1,Sh3gl2,Shank1,Stk24,Unc5a,Vapa                                                                                                                                                                                                                                                                                                                                                                                                                                                                         |
| GO:0023051 | regulation of signaling                      | 69  | 1494 | 0.00077  | Adora2a,Adra2c,Arf6,Arhgef28,Arreb2,Avp,Axin2,Bcan,Bmp6,Bop1,Cabp1,Capn3,Cdc20,Chad,Chst11,Dapk3,Dbn1,Dlg4,Dyrk3,Dyx1c1,Ezr,Fbxl15,Ffar2,Fgf12,Fgf14,Fgfr4,Fzd9,Gata2,Gdf6,Gfi1,Grb7,Grik3,Grina,Grm4,Hgf,Hipk4,Hnf1a,Igfbp6,Ipp1l,Lfng,Lrrtm4,Map2k1,Mapt,Nell2,Nr3c1,Nrg2,Nrxn1,Ntrk2,Palm,Pax8,Pcsk9,Por,Ppfia3,Prkaca,Psd,Rab3a,Rasgrp1,Rbp4,Rita1,Sh3bp1,Shank1,Siah1,Spred2,Src,Stk24,Tgfb3,Trpm2,Unc13a,Vegfb                                                                                                                                                                                                                                                      |
| GO:0065008 | regulation of biological quality             | 82  | 1883 | 0.00077  | Adora2a,Adra2c,Aldh1a3,Ank3,Arf6,Arpc1a,Atp1a3,Avp,B4galnt1,Bcan,Bmp6,Cabp1,Cacna1a,Cacna1g,Cacna1i,Cacna2d1,Capn3,Cdc20,Cln8,Csdc2,Csnk1g2,Dapk3,Dbn1,Dlg4,Elavl2,Ezr,Fam129b,Ffar2,Fgf12,Fgf14,Fgfr4,Fzd9,Gata2,Gfi1,Gjd2,Gpr157,Gpr6,Grid1,Grik3,Grina,Hnf1a,Igfsf9,Itrp3,Jak3,Kcne2,Kcnp1,Kcnk1,Kcnmb4,Map2k1,Mapt,Myc,Nell2,Nos3,Nr3c1,Nrxn1,Ntrk2,Palm,Pax8,Pcsk9,Pif1,Plod3,Por,Ppfia3,RGD1311558,Rab3a,Rbp4,S1pr1,Scn5a,Shank1,Siah1,Slc25a4,Slc39a3,Src,Stim1,Stpg1,Syt3,Tbx3,Trpm2,Unc13a,Usp7,Vwf                                                                                                                                                              |
| GO:0042391 | regulation of membrane potential             | 23  | 291  | 0.00086  | Adora2a,Ank3,Atp1a3,Cacna1a,Cacna1g,Cacna1i,Cacna2d1,Dbn1,Dlg4,Fgf12,Fgf14,Gjd2,Grid1,Grik3,Kcne2,Kcnp1,Kcnk1,Kcnmb4,Myc,Nrxn1,Scn5a,Shank1,Src                                                                                                                                                                                                                                                                                                                                                                                                                                                                                                                           |
| GO:0006996 | organelle organization                       | 58  | 1194 | 0.001    | Actn1,Anp32b,Arf6,Arpc1a,Bet1,Bop1,Bsn,Capn3,Cbx7,Cdc20,Celsr3,Chd6,Cln8,Civs2,Dapk3,Dbn1,Dlg4,Dnmt3a,Dnmt3l,Drc1,Dyrk3,Dyx1c1,Ezr,Grb7,Hipk4,Hnf1a,Kdm8,Map2k1,Mapt,Mical2,Msr2b2,Myc,Nolc1,Nr3c1,Nrxn1,Odft2,Pacsin1,Palm,Pif1,Plec,RGD1311558,RGD1559696,Rab31,Rab3a,Rere,Rtn3,S1pr1,Sh3bp1,Shank1,Slc25a4,Sorbs2,Src,Stpg1,Synj2,Tppp3,Tubb5,Unc13a,Usp7                                                                                                                                                                                                                                                                                                              |
| GO:0034765 | regulation of ion transmembrane transport    | 23  | 295  | 0.001    | Acs15,Ank3,Cabp1,Cacna1a,Cacna1g,Cacna1i,Cacna2d1,Cacna2d2,Capn3,Dlg4,Fgf12,Fgf14,Kcne2,Kcng1,Kcnp1,Kcnp4,Kcnj4,Nrxn1,Pcsk9,Scn5a,Shank1,Slc25a4,Stim1                                                                                                                                                                                                                                                                                                                                                                                                                                                                                                                    |
| GO:1904062 | regulation of cation transmembrane transport | 18  | 194  | 0.0011   | Ank3,Cabp1,Cacna1a,Cacna2d1,Capn3,Dlg4,Fgf12,Fgf14,Kcne2,Kcng1,Kcnp1,Kcnp4,Nrxn1,Pcsk9,Scn5a,Shank1,Slc25a4,Stim1                                                                                                                                                                                                                                                                                                                                                                                                                                                                                                                                                         |
| GO:0048468 | cell development                             | 38  | 661  | 0.0012   | Adora2a,Bmp6,Capn3,Celsr2,Celsr3,Chst11,Dgkg,Dlg4,Dpys15,Ezr,Gata2,Gdf6,Grm4,Igfsf9,Limk2,Lgl1,Map2k1,Mapt,Nolc1,Ntrk2,Odft2,Pacsin1,Pcsk4,Plod3,RGD1311558,Rab3a,Rere,Sh3gl2,Shank1,Sorbs2,Src,Stk24,Tbx3,Tgfb3,Tgfb2,Unc5a,Vapa                                                                                                                                                                                                                                                                                                                                                                                                                                         |
| GO:0009887 | animal organ morphogenesis                   | 22  | 283  | 0.0015   | Adam15,Bmp6,Chad,Chst11,Crip1,Gata2,Hnf1a,Ipp1l,Mical2,Myc,Pax8,Plod3,Rogdi,S1pr1,Scn5a,Slc39a3,Src,Stim1,Tbx3,Tdrd7,Tgfb3,Tgfb2                                                                                                                                                                                                                                                                                                                                                                                                                                                                                                                                          |
| GO:0034762 | regulation of transmembrane transport        | 25  | 350  | 0.0015   | Acs15,Ank3,Cabp1,Cacna1a,Cacna1g,Cacna1i,Cacna2d1,Cacna2d2,Capn3,Dlg4,Fgf12,Fgf14,Kcne2,Kcng1,Kcnp1,Kcnp4,Kcnj4,Myc,Nrxn1,Pcsk9,Pla2g1b,Scn5a,Shank1,Slc25a4,Stim1                                                                                                                                                                                                                                                                                                                                                                                                                                                                                                        |
| GO:0051716 | cellular response to stimulus                | 107 | 2719 | 0.0015   | Acs15,Adam15,Adora2a,Adra2c,Ank3,Arhgap27,Arhgef28,Arreb2,Atp1a3,Avp,Axin2,Bmp6,Brinp3,Cacna1g,Capn2,Capn3,Cd8a,Cebpe,Celsr2,Celsr3,Chad,Chd6,Crip1,Csnk1g2,Dapk3,Dbn1,Dgkg,Dnmt3a,Dok3,ENSRNOG00000050782,Elavl2,Ezr,Ffar2,Fgf12,Fgfr4,Fto,Fzd9,Galr3,Gdf6,Gfi1,Gnb2,Gng7,Gpr157,Gpr6,Grasp,Grb7,Grid1,Grik3,Grm4,Hgf,Hnf1a,Igfbp6,Itrp3,Jak3,Kcne2,Kcng1,Limk2,Lrrtm4,Lzts2,Mag,Map2k1,Mapt,Matk,Mtr,Myc,Nos3,Nr3c1,Nrg2,Nrxn1,Ntrk2,Palm,Pax8,Pcsk9,Pif1,Pkm,Pla2g1b,Plod1,Plod3,Pomt1,Por,Ppp1r14a,Ppp1r15a,Prkaca,RGD1311558,Rab31,Rab3a,Rasgrp1,Rassf9,Rita1,S1pr1,Scn5a,Sh3bp1,Sh3gl2,Src,Sstr2,Stk24,Tbx3,Tgfb3,Tgfb2,Tle3,Trpm2,Ucp3,Unc13a,Unc5a,Usp7,Vegfb,Vwf |
| GO:0023052 | signaling                                    | 84  | 2006 | 0.0018   | Adam15,Adora2a,Adra2c,Ank3,Arhgap27,Arhgef28,Arreb2,Atp1a3,Avp,Axin2,Bmp6,Cacna1a,Cacna1g,Cacna1i,Cd8a,Celsr2,Celsr3,Chad,Crip1,Csnk1g2,Dapk3,Dgkg,Dok3,ENSRNOG00000050782,Ezr,Fam129b,Ffar2,Fgf12,Fgfr4,Fzd9,Galr3,Gdf6,Gjd2,Gnb2,Gng7,Gpr157,Gpr6,Grasp,Grb7,Grid1,Grik3,Grm4,Hgf,Hnf1a,Itrp3,Jak3,Kcne2,Kcnmb4,Limk2,Lrrtm4,Lzts2,Map2k1,Mapt,Matk,Myc,Nos3,Nr3c1,Nrg2,Nrxn1,Ntrk2,Palm,Ppfia3,Ppp1r15a,RGD1311558,Rab3a,Rasgrp1,Rassf9,Rita1,S1pr1,Scn5a,Sh3bp1,Src,Sstr2,Stk24,Syt3,Tbx3,Tbx5,Tgfb3,Tgfb2,Tle3,Trpm2,Unc13a,Unc5a,Vegfb                                                                                                                              |
| GO:0043269 | regulation of ion transport                  | 29  | 452  | 0.0019   | Acs15,Adora2a,Ank3,Arreb2,Avp,Cabp1,Cacna1a,Cacna1g,Cacna1i,Cacna2d1,Cacna2d2,Capn3,Dlg4,Fgf12,Fgf14,Jak3,Kcne2,Kcng1,Kcnp1,Kcnp4,Kcnp4,Nr3c1,Nrxn1,Pcsk9,Scn5a,Shank1,Slc15a1,Slc25a4,Stim1                                                                                                                                                                                                                                                                                                                                                                                                                                                                              |

|            |                                                           |    |      |        |                                                                                                                                                                                                                                                                                                                                                                                                                                                                                                                                     |
|------------|-----------------------------------------------------------|----|------|--------|-------------------------------------------------------------------------------------------------------------------------------------------------------------------------------------------------------------------------------------------------------------------------------------------------------------------------------------------------------------------------------------------------------------------------------------------------------------------------------------------------------------------------------------|
| GO:0071840 | cellular component organization or biogenesis             | 86 | 2085 | 0.0023 | Actn1,Adora2a,Aldh1a3,Ank3,Anp32b,Arf6,Arpc1a,Bet1,Bop1,Bsn,Capn3,Cbx7,Ccdc80,Cdc20,Celsr2,Celsr3,Chd6,Cln8,Civ s2,Dapk3,Dbn1,Diexf,Dkc1,Dlg4,Dnmt3a,Dnmt3l,Dpysl5,Drc1,Dyrk3,Dyx1c1,Ezr,Grb7,Grm4,Hgf,Hipk4,Hnf1a,Igfsf9,Itp3,Kcng1,Kdm8,Lgl1,Lrrtm4,Map2k1,Mapt,Mical2,Msrb2,Myc,Nell2,Nolc1,Nr3c1,Nrxn1,Odf2,Pacsin1,Palin,Pif1,Pkm,Plac,Plod3,Pomt1,RGD1311558,RGD1559696,Rab31,Rab3a,Rasgrp1,Rere,Rpl35a,Rtn3,S1pr1,Sh3bp1,Sh3gl2,Shank1,Slc25a4,Slc39a3,Sorbs2,Src,Stk24,Stpg1,Synj2,Tgfb3,Tppp3,Tubb5,Unc13a,Unc5a,Usp7,Vapa |
| GO:2001257 | regulation of cation channel activity                     | 12 | 98   | 0.0023 | Ank3,Cabp1,Cacna1a,Cacna2d1,Dlg4,Fgf12,Fgf14,Kcne2,Kcng1,Nrxn1,Shank1,Stim1                                                                                                                                                                                                                                                                                                                                                                                                                                                         |
| GO:0007010 | cytoskeleton organization                                 | 26 | 391  | 0.0027 | Actn1,Arf6,Arpc1a,Bsn,Capn3,Cdc20,Cln8,Dbn1,Drc1,Dyx1c1,Ezr,Mapt,Mical2,Msrb2,Odf2,Pacsin1,Palin,Pif1,Pkm,Plac,Plod3,Pomt1,RGD1311558,RGD1559696,Rab31,Rab3a,Rasgrp1,Rere,Rpl35a,Rtn3,S1pr1,Sh3bp1,Sh3gl2,Shank1,Slc25a4,Slc39a3,Sorbs2,Src,Stk24,Stpg1,Synj2,Tgfb3,Tppp3,Tubb5,Unc13a,Unc5a,Usp7,Vapa                                                                                                                                                                                                                              |
| GO:0000902 | cell morphogenesis                                        | 19 | 236  | 0.0029 | Adora2a,Celsr2,Celsr3,Dlg4,Dpysl5,Hgf,Lgl1,Map2k1,Pacsin1,Plod3,RGD1311558,Rab3a,Rere,Sh3gl2,Shank1,Slc39a3,Src,Stk24,Unc5a                                                                                                                                                                                                                                                                                                                                                                                                         |
| GO:0016043 | cellular component organization                           | 83 | 2018 | 0.0032 | Actn1,Adora2a,Aldh1a3,Ank3,Anp32b,Arf6,Arpc1a,Bet1,Bop1,Bsn,Capn3,Cbx7,Ccdc80,Cdc20,Celsr2,Celsr3,Chd6,Cln8,Civ s2,Dapk3,Dbn1,Dlg4,Dnmt3a,Dnmt3l,Dpysl5,Drc1,Dyrk3,Dyx1c1,Ezr,Grb7,Grm4,Hgf,Hipk4,Hnf1a,Igfsf9,Itp3,Kcng1,Kdm8,Lgl1,Lrrtm4,Map2k1,Mapt,Mical2,Msrb2,Myc,Nell2,Nolc1,Nr3c1,Nrxn1,Odf2,Pacsin1,Palin,Pif1,Pkm,Plac,Plod3,Pomt1,RGD1311558,RGD1559696,Rab31,Rab3a,Rasgrp1,Rere,Rtn3,S1pr1,Sh3bp1,Sh3gl2,Shank1,Slc25a4,Slc39a3,Sorbs2,Src,Stk24,Stpg1,Synj2,Tgfb3,Tppp3,Tubb5,Unc13a,Unc5a,Usp7,Vapa                   |
| GO:0007154 | cell communication                                        | 85 | 2085 | 0.0033 | Adam15,Adora2a,Adra2c,Ank3,Arhgap27,Arhgef28,Arrb2,Atp1a3,Avp,Axin2,Bmp6,Cacna1a,Cacna1g,Cacna1i,Cd8a,Celsr2,Celsr3,Chad,Crip1,Csnk1g2,Dapk3,Dgk,Dok3,ENSRNOG0000050782,Ezr,Fam129b,Ffar2,Fgf12,Fgf14,Fzd9,Gata2,Gdf6,Gfi1,Ggr7,Grina,Hgf,Hnf1a,Igfbp6,Inpp1,Jak3,Lfng,Lrrtm4,Map2k1,Masp1,Mefv,Myc,Nr3c1,Nrg2,Nrxn1,Ntrk2,Palin,Pcsk9,Ppfa3,Ppp1r15a,RGD1311558,Rab3a,Rasgrp1,Rassf9,Rita1,S1pr1,Scn5a,Sh3bp1,Src,Sstr2,Stk24,Syt3,Tbx3,Tbx5,Tgfb3,Tgfb2,Tle3,Trpm2,Unc13a,Unc5a,Vegfb                                             |
| GO:0042127 | regulation of cell population proliferation               | 39 | 730  | 0.0033 | Adk,Adora2a,Anp32b,Avp,Axin2,Bmp6,Cdc20,Chst11,Dkc1,Fam129b,Fgf14,Fzd9,Gata2,Grm4,Hgf,Jak3,Matk,Myc,Nolc1,Nos3,Nr3c1,Ntrk2,Pla2g1b,Por,Ppp1cc,Ppp1r15a,Prkaca,Rnf187,Rogdi,S1pr1,Scn5a,Src,Sstr2,Tbx3,Tbx5,Tes,Tgfb3,Tgfb2,Vegfb                                                                                                                                                                                                                                                                                                    |
| GO:0022898 | regulation of transmembrane transporter activity          | 14 | 142  | 0.004  | Ank3,Cabp1,Cacna1a,Cacna2d1,Dlg4,Fgf12,Fgf14,Kcne2,Kcng1,Nrxn1,Pcsk9,Shank1,Slc25a4,Stim1                                                                                                                                                                                                                                                                                                                                                                                                                                           |
| GO:0048583 | regulation of response to stimulus                        | 69 | 1609 | 0.0043 | Adk,Adora2a,Adra2c,Arf6,Arhgef28,Arrb2,Avp,Axin2,Bmp6,Bop1,C4a,Cabp1,Capn3,Chad,Chst11,Dapk3,Dbn1,Dlg4,Dyrk3,Dyx1c1,Ezr,Fbxl15,Ffar2,Fgf12,Fgf14,Fgf14,Fzd9,Gata2,Gdf6,Gfi1,Grb7,Grina,Hgf,Hipk4,Hnf1a,Igfbp6,Inpp1,Jak3,Lfng,Lrrtm4,Map2k1,Masp1,Mefv,Myc,Nr3c1,Nrg2,Nrxn1,Ntrk2,Palin,Pcsk9,Pgc,Por,Psd,Rasgrp1,Rita1,S1pr1,Scn5a,Sh3bp1,Shank1,Siah1,Slc25a4,Spred2,Src,Stk24,Tgfb3,Tgfb2,Trim63,Trpm2,Vegfb                                                                                                                     |
| GO:0051239 | regulation of multicellular organismal process            | 60 | 1346 | 0.0048 | Adk,Adora2a,Adra2c,Arf6,Arrb2,Avp,Axin2,Bmp6,Brinp3,Cacna1g,Cacna2d2,Capn3,Cdc20,Celsr3,Dbn1,Dlg4,Elavl2,Ezr,Ffar2,Fgf12,Fkbp1,Fto,Fzd9,Gata2,Gdf6,Gfi1,Hgf,Inpp1,Jak3,Kcne2,Lfng,Map2k1,Mapt,Mefv,Myc,Nr3c1,Nrxn1,Ntrk2,Pacsin1,Pax8,Pcsk9,Por,Ppp1cc,Ppp1r15a,RGD1311558,Rasgrp1,S1pr1,Scn5a,Shank1,Slc25a4,Src,Sstr2,Stk24,Tbx3,Tbx5,Tgfb3,Tgfb2,Trim63,Vegfb                                                                                                                                                                    |
| GO:0098742 | cell-cell adhesion via plasma-membrane adhesion molecules | 10 | 75   | 0.0048 | Cdh22,Celsr2,Celsr3,Fat3,Gypc,Igfsf9,Map2k1,Nrxn1,Tgfb2                                                                                                                                                                                                                                                                                                                                                                                                                                                                             |
| GO:2000026 | regulation of multicellular organismal development        | 44 | 889  | 0.0052 | Adra2c,Arf6,Arrb2,Axin2,Bmp6,Brinp3,Capn3,Cdc20,Celsr3,Dbn1,Dlg4,Elavl2,Fkbp1,Fzd9,Gata2,Gdf6,Gfi1,Hgf,Inpp1,Jak3,Lfng,Map2k1,Masp1,Mefv,Myc,Nr3c1,Nrxn1,Ntrk2,Pacsin1,Pax8,Por,Ppp1cc,Ppp1r15a,RGD1311558,Rasgrp1,S1pr1,Shank1,Slc25a4,Src,Stk24,Tbx3,Tbx5,Tgfb3,Tgfb2,Vegfb                                                                                                                                                                                                                                                       |
| GO:0006810 | transport                                                 | 75 | 1810 | 0.0053 | Abcd2,Acsf5,Anp32b,Anxa6,Arf6,Arhgap27,Arrb2,Asic4,Atp1a3,Bet1,Bsn,Cacna1a,Cacna1g,Cacna1i,Cacna2d1,Cacna2d2,Cebpe,Cln8,Csnk1g2,Dlg4,Ezr,Fam129b,Gata2,Grid1,Grik3,Grina,Grm4,Hare,Hnf1a,Itp3,Kcne2,Kcng1,Kcnp1,Kcnp4,Kcnj4,Kcnk1,Kcnmb4,Klcl1,Lgl1,Map2k1,Myc,Nrxn1,Pacsin1,Pcsk9,Pip5k1c,Pla2g1b,Ppfa3,Psd,RGD1559696,Rab31,Rab3a,Rasgrp1,Rassf9,Rbp4,Rita1,Rtn3,Scamp4,Scn5a,Sh3bp1,Sh3gl2,Slc10a4,Slc15a1,Slc25a4,Slc39a3,Slc3a2,Src,Stim1,Ston2,Stpg1,Svop,Syt3,Tbx3,Tgfb2,Trpm2,Ucp3,Unc13a                                   |
| GO:0032989 | cellular component morphogenesis                          | 20 | 275  | 0.0056 | Adora2a,Capn3,Celsr2,Celsr3,Dlg4,Dpysl5,Hgf,Lgl1,Map2k1,Pacsin1,Plod3,RGD1311558,Rab3a,Rere,Sh3gl2,Shank1,Slc39a3,Src,Stk24,Unc5a                                                                                                                                                                                                                                                                                                                                                                                                   |
| GO:0098609 | cell-cell adhesion                                        | 13 | 130  | 0.0056 | Adam15,Cdh22,Celsr2,Celsr3,Ezr,Fat3,Gypc,Igfsf9,Map2k1,Nrxn1,Src,Tgfb2                                                                                                                                                                                                                                                                                                                                                                                                                                                              |
| GO:0070887 | cellular response to chemical stimulus                    | 60 | 1365 | 0.0061 | Acsf5,Adam15,Ank3,Arrb2,Atp1a3,Axin2,Bmp6,Brinp3,Cacna1g,Capn3,Cebpe,Chad,Chd6,Crip1,Dapk3,Dbn1,Dnmt3a,Elavl2,Ezr,Ffar2,Fgf12,Fgf14,Gdf6,Gfi1,Hgf,Igfbp6,Itp3,Jak3,Kcne2,Lrrtm4,Mapt,Mtr,Myc,Nos3,Nr3c1,Nrxn1,Ntrk2,Pax8,Pcsk9,Pkm,Pla2g1b,Plod1,Plod3,Pomt1,Por,Ppp1r14a,Ppp1r15a,Rab31,S1pr1,Scn5a,Sh3gl2,Src,Sstr2,Stk24,Tgfb3,Tgfb2,Trpm2,Ucp3,Vwf                                                                                                                                                                              |
| GO:0051234 | establishment of localization                             | 76 | 1856 | 0.0062 | Abcd2,Acsf5,Anp32b,Anxa6,Arf6,Arhgap27,Arrb2,Asic4,Atp1a3,Bet1,Bsn,Cacna1a,Cacna1g,Cacna1i,Cacna2d1,Cacna2d2,Cebpe,Cln8,Csnk1g2,Dlg4,Ezr,Fam129b,Gata2,Grid1,Grik3,Grina,Grm4,Hare,Hnf1a,Itp3,Kcne2,Kcng1,Kcnp1,Kcnp4,Kcnj4,Kcnk1,Kcnmb4,Klcl1,Lgl1,Map2k1,Myc,Nrxn1,Pacsin1,Pcsk9,Pip5k1c,Pla2g1b,Ppfa3,Psd,RGD1559696,Rab31,Rab3a,Rasgrp1,Rassf9,Rbp4,Rita1,Rtn3,Scamp4,Scn5a,Sh3bp1,Sh3gl2,Slc10a4,Slc15a1,Slc25a4,Slc39a3,Slc3a2,Src,Stim1,Ston2,Stpg1,Svop,Syt3,Tbx3,Tgfb2,Trpm2,Ucp3,Unc13a                                   |
| GO:0003008 | system process                                            | 41 | 823  | 0.0071 | Adora2a,Adra2c,Arrb2,Atp1a3,Avp,Cabp1,Cacna1a,Cacna1g,Cacna1i,Cln8,Dbn1,Dlg4,Elavl2,Ezr,Fam129b,Fgf12,Fzd9,Gj d2,Grid1,Grik3,Hnf1a,Kcne2,Kcnmb4,Map2k1,Mapt,Mmp24,Nos3,Nr3c1,Ntrk2,Plod3,Pomk,Rab3a,Rbp4,S1pr1,Scn5a,Sh ank1,Sorbs2,Src,Sstr2,Tbx3,Trim63                                                                                                                                                                                                                                                                           |
| GO:0007267 | cell-cell signaling                                       | 27 | 455  | 0.0081 | Adora2a,Adra2c,Axin2,Cacna1a,Cacna1g,Celsr3,Csnk1g2,Fam129b,Fgf12,Fzd9,Gjd2,Grid1,Grik3,Grm4,Hgf,Hnf1a,Kcnmb4,Lzts2,Myc,Ppfa3,Rab3a,Scn5a,Syt3,Tbx3,Tbx5,Tle3,Unc13a                                                                                                                                                                                                                                                                                                                                                                |
| GO:0007015 | actin filament organization                               | 11 | 101  | 0.0087 | Actn1,Arpc1a,Dbn1,Ezr,Mical2,Msrb2,Pacsin1,RGD1311558,Sh3bp1,Sorbs2,Src                                                                                                                                                                                                                                                                                                                                                                                                                                                             |

|            |                                                                         |    |      |        |                                                                                                                                                                                                                                                                                                                                                                                                                                                                                                                                                                                                        |
|------------|-------------------------------------------------------------------------|----|------|--------|--------------------------------------------------------------------------------------------------------------------------------------------------------------------------------------------------------------------------------------------------------------------------------------------------------------------------------------------------------------------------------------------------------------------------------------------------------------------------------------------------------------------------------------------------------------------------------------------------------|
| GO:0032412 | regulation of ion transmembrane transporter activity                    | 13 | 138  | 0.0087 | Ank3,Cabp1,Cacna1a,Cacna2d1,Dlg4,Fgf12,Fgf14,Kcne2,Kcng1,Nrxn1,Pcsk9,Shank1,Stim1                                                                                                                                                                                                                                                                                                                                                                                                                                                                                                                      |
| GO:0042221 | response to chemical                                                    | 88 | 2261 | 0.0087 | Acs15,Adam15,Adora2a,Aldh1a3,Ank3,Arrb2,Atp1a3,Avp,Axin2,Bmp6,Brinp3,Cacna1g,Capn2,Capn3,Cbx7,Cebpe,Celsr3,Chad,Chd6,Cln8,Crip1,Cyb5a,Dapk3,Dbn1,Dnmt3a,Dnmt3l,Dpysl5,Elavl2,Ezr,Ffar2,Fgf12,Fgfr4,Gata2,Gdf6,Gfi1,Hgf,Hnf1a,Igfals,Inpp1l1,Iptr3,Jak3,Kcne2,Kcnk1,Kcnmb4,Lrrtm4,Map2k1,Mapt,Mefv,Msi1,Mtr,Myc,Nos3,Nr3c1,Nrxn1,Ntrk2,Pax8,Pcsk9,Pip5k1c,Pkm,Pla2g1b,Plec,Plod1,Plod3,Pomt1,Por,Ppp1r14a,Ppp1r15a,Rab31,Rbp4,S1pr1,Scn5a,Sh3gl2,Shank1,Slc25a4,Src,Sstr2,Stim1,Stk24,Syt3,Tgfb3,Tgfb2,Tox2,Trim63,Trpm2,Ucp3,Unc5a,Vegfb,Vwf                                                           |
| GO:0048812 | neuron projection morphogenesis                                         | 15 | 179  | 0.0088 | Adora2a,Celsr2,Celsr3,Dlg4,Dpysl5,Llg1,Map2k1,Pacsin1,RGD1311558,Rab3a,Rere,Sh3gl2,Shank1,Stk24,Unc5a                                                                                                                                                                                                                                                                                                                                                                                                                                                                                                  |
| GO:0009966 | regulation of signal transduction                                       | 55 | 1248 | 0.0091 | Adora2a,Adra2c,Arf6,Arhgef28,Arrb2,Avp,Axin2,Bmp6,Bop1,Cabp1,Capn3,Chad,Chst11,Dapk3,Dbn1,Dlg4,Dyrk3,Dyx1c1,Ezr,Fbx15,Fgf12,Fgf14,Fgfr4,Fzd9,Gata2,Gdf6,Gfi1,Grb7,Grina,Hgf,Hipk4,Hnf1a,Igfbp6,Inpp1l1,Lfng,Lrrtm4,Map2k1,Nr3c1,Nrg2,Nrxn1,Ntrk2,Palm,Pcsk9,Por,Psd,Rasgrp1,Rita1,Sh3bp1,Shank1,Siah1,Spred2,Src,Stk24,Tgfb3,Vegfb                                                                                                                                                                                                                                                                     |
| GO:0010959 | regulation of metal ion transport                                       | 18 | 246  | 0.0091 | Adora2a,Ank3,Arrb2,Cabp1,Cacna1a,Cacna1g,Cacna2d1,Capn3,Fgf12,Fgf14,Jak3,Kcne2,Kcng1,Kcnip1,Kcnip4,Pcsk9,Scn5a,Stim1                                                                                                                                                                                                                                                                                                                                                                                                                                                                                   |
| GO:0021700 | developmental maturation                                                | 10 | 85   | 0.0091 | Dlg4,Gata2,Nrxn1,Palm,Pcsk4,Rab3a,Rere,S1pr1,Shank1,Unc13a                                                                                                                                                                                                                                                                                                                                                                                                                                                                                                                                             |
| GO:0022414 | reproductive process                                                    | 36 | 703  | 0.0091 | Adam15,Adra2c,Arrb2,Atat1,Avp,B4galnt1,Bmp6,Cacna1,Cbx7,Celsr2,Crip1,Dbn1,Dnmt3a,Dnmt3l,Gata2,Hnf1a,Lfng,Limk2,Mapt,Myc,Nell2,Nos3,Nr3c1,Odf2,Pcsk4,Plec,Scamp4,Siah1,Src,Sstr2,Tbx3,Tdrd7,Tgfb3,Tgfb2,Tox2,Trpm2                                                                                                                                                                                                                                                                                                                                                                                      |
| GO:0030029 | actin filament-based process                                            | 17 | 223  | 0.0091 | Actn1,Arf6,Arpc1a,Cacna1g,Capn3,Dbn1,Ezr,Kcne2,Mical2,Msrb2,Pacsin1,RGD1311558,S1pr1,Scn5a,Sh3bp1,Sorbs2,Src                                                                                                                                                                                                                                                                                                                                                                                                                                                                                           |
| GO:0050793 | regulation of developmental process                                     | 50 | 1096 | 0.0091 | Adra2c,Arf6,Arrb2,Atat1,Axin2,Bmp6,Brinp3,Capn3,Cdc20,Celsr3,Csnk1g2,Dapk3,Dbn1,Dlg4,Elavl2,Ezr,Fkbp1,Fto,Fzd9,Gata2,Gdf6,Gfi1,Hgf,Inpp1l1,Jak3,Lfng,Mag,Mapt,Myc,Nr3c1,Nrxn1,Ntrk2,Pacsin1,Palm,Pax8,Por,Ppp1c,Ppp1r15a,RGD1311558,Rasgrp1,S1pr1,Shank1,Slc25a4,Src,Stk24,Tbx3,Tbx5,Tgfb3,Tgfb2,Vegfb                                                                                                                                                                                                                                                                                                 |
| GO:0050804 | modulation of chemical synaptic transmission                            | 19 | 268  | 0.0091 | Adora2a,Arrb2,Bcan,Cabp1,Cdc20,Dbn1,Dlg4,Fgf14,Grik3,Grm4,Mapt,Nr3c1,Nrxn1,Ntrk2,Ppfia3,Prkaca,Rab3a,Shank1,Unc13a                                                                                                                                                                                                                                                                                                                                                                                                                                                                                     |
| GO:0050905 | neuromuscular process                                                   | 7  | 39   | 0.0091 | Adora2a,Cln8,Dbn1,Dlg4,Fgf12,Pomk,Shank1                                                                                                                                                                                                                                                                                                                                                                                                                                                                                                                                                               |
| GO:0045935 | positive regulation of nucleobase-containing compound metabolic process | 34 | 654  | 0.0099 | Arrb2,Bmp6,Capn3,Cbx7,Cebpe,Chd6,Dnmt3l,Fam129b,Fgfr4,Galr3,Gata2,Gdf6,Hgf,Hnf1a,Kdm8,Map2k1,Mical2,Myc,Nfe2,Nolc1,Nos3,Nr3c1,Pax8,Phox2a,Rere,Rnf187,S1pr1,Src,Tbx3,Tbx5,Tgfb3,Tox2,Usp7,Zfp90                                                                                                                                                                                                                                                                                                                                                                                                        |
| GO:0048523 | negative regulation of cellular process                                 | 75 | 1880 | 0.011  | Adam15,Adora2a,Ank3,Anp32b,Arf6,Arrb2,Avp,Axin2,Bmp6,Brinp3,C4a,Cabp1,Capn3,Cbx7,Chad,Chst11,Cln8,Dapk3,Dbn1,Dlg4,Dnmt3a,Dnmt3l,Dyrk3,Ezr,Fam129b,Foxg1,Fzd9,Gata2,Gfi1,Grb7,Grik3,Grina,Grm4,Hgf,Hnf1a,Inpp1l1,Iptr3,Jak3,Kcne2,Lfng,Lrrtm4,Mag,Map2k1,Mefv,Myc,Nos3,Nrxn1,Ntrk2,Palm,Pax8,Pcsk9,Pif1,Por,Ppp1r14a,Ppp1r15a,Prkaca,Rere,Rita1,S1pr1,Sh3bp1,Sh3rf2,Shank1,Slc25a4,Src,Sstr2,Stk24,Tbx3,Tbx5,Tes,Tgfb3,Tgfb2,Trpm2,Tsks,Zbtb42,Zfp90                                                                                                                                                    |
| GO:0120036 | plasma membrane bounded cell projection organization                    | 26 | 449  | 0.0116 | Adora2a,Arf6,Celsr2,Celsr3,Dlg4,Dpysl5,Drc1,Dyx1c1,Ezr,Grm4,Igfsf9,Llg1,Map2k1,Mapt,Odf2,Pacsin1,RGD1311558,Rab3a,Rere,S1pr1,Sh3bp1,Sh3gl2,Shank1,Stk24,Unc5a,Vapa                                                                                                                                                                                                                                                                                                                                                                                                                                     |
| GO:0060255 | regulation of macromolecule metabolic process                           | 84 | 2174 | 0.012  | Adk,Adora2a,Adra2c,Ank3,Anp32b,Arrb2,Avp,Axin2,Bmp6,C4a,Capn3,Cbx7,Cdc20,Cebpe,Celsr3,Chad,Chd6,Crip1,Csd2,Dapk3,Dlg4,Dnmt3a,Dnmt3l,Dpf1,Dyx1c1,Elavl2,Ezr,Fam129b,Fbx15,Fgfr4,Foxg1,Galr3,Gata2,Gdf6,Gfi1,Grb7,Hgf,Hnf1a,Inpp1l1,Jak3,Kcne2,Kdm8,Lrrtm4,Map2k1,Mbnl2,Mical2,Myc,Nfe2,Nolc1,Nr3c1,Ntrk2,Pax8,Pcsk9,Phox2a,Pif1,Pomt1,Por,Pou2f1,Ppp1c,Ppp1r14a,Ppp1r15a,Rasgrp1,Rere,Rnf187,S1pr1,Sbno1,Sh3gl2,Sh3rf2,Src,Stk24,Taf6,Tbx3,Tbx5,Tdrd7,Tgfb3,Tgfb2,Tle3,Tox2,Uncx,Usp7,Zbtb42,Zbtb8a,Zfp37,Zfp90                                                                                         |
| GO:0007166 | cell surface receptor signaling pathway                                 | 38 | 775  | 0.0123 | Adam15,Adora2a,Arrb2,Atp1a3,Axin2,Bmp6,Cd8a,Celsr2,Celsr3,Chad,Csnk1g2,Ffar2,Fgf12,Fgfr4,Fzd9,Gdf6,Gpr157,Grid1,Grik3,Grm4,Hgf,Hnf1a,Jak3,Lrrtm4,Lzts2,Matk,Myc,Nrg2,Ntrk2,RGD1311558,Rita1,Sh3bp1,Src,Tgfb3,Tgfb2,Tle3,Unc5a,Vegfb                                                                                                                                                                                                                                                                                                                                                                    |
| GO:0043170 | macromolecule metabolic process                                         | 99 | 2669 | 0.0127 | Adam15,Amz2,Arrb2,Atat1,Avp,B4galnt1,Bop1,C4a,Capn11,Capn2,Capn3,Cbx7,Cdc20,Cebpe,Chd6,Chst11,Cln8,Cpa2,Csd2,Csnk1g2,Ctrc,Dapk3,Diexf,Dkc1,Dnmt3a,Dnmt3l,Dpf1,Dyrk3,ENSRNOG0000050782,Ezr,Fbx15,Fgfr4,Foxg1,Fto,Gata2,Gdf6,Gfi1,Hgf,Hipk4,Hnf1a,Jak3,Kdm8,Lfng,Limk2,Map2k1,Masp1,Matk,Mbnl2,Mmp24,Msrb2,Mtr,Myc,Nfe2,Nolc1,Nr3c1,Nrg2,Ntrk2,Pax8,Pcsk4,Pcsk9,Pgc,Phox2a,Pif1,Plod1,Plod3,Pomk,Pomt1,Por,Pou2f1,Ppp1c,Prkaca,Qtrt1,Rab31,Repin1,Rere,Rnf182,Rnf187,Rnf44,Rpl35a,Sh3rf2,Siah1,Src,Stk24,Taf6,Tbx3,Tbx5,Tgfb2,Tle3,Tox2,Trim63,Trmt11,U2af1l4,Uncx,Usp7,Zbtb42,Zbtb8a,Zdhc22,Zfp37,Zfp90 |
| GO:0060322 | head development                                                        | 26 | 454  | 0.0129 | Aldh1a3,Arrb2,Atat1,Atp1a3,Cdh22,Dbn1,Foxg1,Gata2,Inpp1l1,Limk2,Mapt,Myc,Nr3c1,Nrxn1,Ntrk2,Pomk,Rere,Rogdi,S1pr1,Scn5a,Src,Sstr2,Synj2,Tbx3,Tgfb3,Tgfb2                                                                                                                                                                                                                                                                                                                                                                                                                                                |
| GO:0098657 | import into cell                                                        | 19 | 282  | 0.013  | Arhgap27,Arrb2,Cebpe,Cln8,Csnk1g2,Ezr,Gata2,Hare,Kcne2,Kcnj4,Pacsin1,Pip5k1c,Rab31,Sh3bp1,Sh3gl2,Slc3a2,Ston2,Tgfb2,Trpm2                                                                                                                                                                                                                                                                                                                                                                                                                                                                              |
| GO:0006928 | movement of cell or subcellular component                               | 27 | 486  | 0.0144 | Arrb2,Bsn,Cacna1g,Cacna1i,Celsr3,Dpysl5,Drc1,Dyx1c1,Ffar2,Fgfr4,Gata2,Hgf,Jak3,Kcne2,Map2k1,Ntrk2,Pomk,RGD1311558,RGD1559696,Rasgrp1,Rere,S1pr1,Scn5a,Sh3bp1,Src,Trpm2,Unc5a                                                                                                                                                                                                                                                                                                                                                                                                                           |
| GO:0007155 | cell adhesion                                                           | 20 | 309  | 0.0144 | Adam15,Bcan,Cdh22,Celsr2,Celsr3,Ezr,Fat3,Gypc,Hare,Igfals,Igfsf9,Inpp1l1,Mag,Mmp24,Ninj1,Nrxn1,Pip5k1c,Src,Tgfb2,Vwf                                                                                                                                                                                                                                                                                                                                                                                                                                                                                   |
| GO:0007417 | central nervous system development                                      | 29 | 539  | 0.0144 | Adora2a,Aldh1a3,Arrb2,Atat1,Atp1a3,Bcan,Cdh22,Cln8,Dbn1,Foxg1,Gata2,Inpp1l1,Mag,Mapt,Myc,Nr3c1,Nrxn1,Ntrk2,Pax8,Pomk,Rere,Rogdi,S1pr1,Scn5a,Src,Sstr2,Synj2,Tbx3,Tgfb2                                                                                                                                                                                                                                                                                                                                                                                                                                 |

|            |                                                           |    |      |        |                                                                                                                                                                                                                                                                                                                                                                                                                                                                                                                    |
|------------|-----------------------------------------------------------|----|------|--------|--------------------------------------------------------------------------------------------------------------------------------------------------------------------------------------------------------------------------------------------------------------------------------------------------------------------------------------------------------------------------------------------------------------------------------------------------------------------------------------------------------------------|
| GO:0008284 | positive regulation of cell population proliferation      | 25 | 434  | 0.0144 | Adk,Anp32b,Avp,Bmp6,Cdc20,Dkc1,Fgfr4,Fzd9,Gata2,Hgf,Jak3,Myc,Nolc1,Ntrk2,Pla2g1b,PPP1cc,Prkaca,Rnf187,Rogdi,S1pr1,Scn5a,Tbx3,Tgfb3,Tgfb2,Vegfb                                                                                                                                                                                                                                                                                                                                                                     |
| GO:0009891 | positive regulation of biosynthetic process               | 37 | 757  | 0.0144 | Acs15,Arrb2,Avp,Bmp6,Capn3,Cbx7,Cebpe,Chd6,Fam129b,Fgfr4,Galr3,Gata2,Gdf6,Hgf,Hnf1a,Jak3,Kdm8,Map2k1,Mical2,Myc,Nfe2,Nolc1,Nos3,Nr3c1,Pax8,Phox2a,Pom1,Por,Rere,Rnf187,S1pr1,Src,Tbx3,Tbx5,Tgfb3,Tox2,Zfp90                                                                                                                                                                                                                                                                                                        |
| GO:0031328 | positive regulation of cellular biosynthetic process      | 36 | 728  | 0.0144 | Acs15,Arrb2,Avp,Bmp6,Capn3,Cbx7,Cebpe,Chd6,Fam129b,Fgfr4,Galr3,Gata2,Gdf6,Hgf,Hnf1a,Kdm8,Map2k1,Mical2,Myc,Nfe2,Nolc1,Nos3,Nr3c1,Pax8,Phox2a,Pom1,Por,Rere,Rnf187,S1pr1,Src,Tbx3,Tbx5,Tgfb3,Tox2,Zfp90                                                                                                                                                                                                                                                                                                             |
| GO:0048519 | negative regulation of biological process                 | 81 | 2096 | 0.0144 | Adam15,Adora2a,Adra2c,Ank3,Anp32b,Arf6,Arrb2,Avp,Axin2,Bmp6,Brinp3,C4a,Cabp1,Capn3,Cbx7,Chad,Chst11,Cln8,Dapk3,Dbn1,Dlg4,Dnmt3a,Dnmt3l,Dyrk3,Ezr,Fam129b,Fgf12,Foxg1,Fzd9,Gata2,Gfi1,Grb7,Grik3,Grina,Grm4,Hgf,Hnf1a,Inpp1,Itpr3,Jak3,Kcne2,Lfng,Lrrtm4,Map2k1,Mefv,Myc,Nos3,Nrxn1,Ntrk2,Oasl,Palm,Pax8,Pcsk9,Pif1,Por,Pou2f1,PPP1r14a,PPP1r15a,Prkaca,Rere,Rita1,S1pr1,Sh3bp1,Sh3rf2,Shank1,Slc15a1,Slc25a4,Src,Sstr2,Stk24,Tbx3,Tbx5,Tes,Tgfb3,Tgfb2,Trim63,Trpm2,Tsks,Zbtb42,Zfp90                              |
| GO:0043270 | positive regulation of ion transport                      | 15 | 196  | 0.0145 | Acs15,Adora2a,Ank3,Arrb2,Avp,Cacna2d1,Capn3,Fgf12,Fgf14,Jak3,Kcne2,Nr3c1,Scn5a,Slc25a4,Stim1                                                                                                                                                                                                                                                                                                                                                                                                                       |
| GO:0051094 | positive regulation of developmental process              | 34 | 676  | 0.0145 | Adra2c,Arrb2,Bmp6,Brinp3,Capn3,Cdc20,Dbn1,Dlg4,Elavl2,Ezr,Fzd9,Gata2,Gdf6,Hgf,Mapt,Myc,Nr3c1,Nrxn1,Ntrk2,Pacsin1,Pax8,Por,PPP1cc,RGD1311558,Rasgrp1,Shank1,Slc25a4,Src,Stk24,Tbx5,Tgfb3,Tgfb2,Vegfb                                                                                                                                                                                                                                                                                                                |
| GO:0019222 | regulation of metabolic process                           | 89 | 2365 | 0.0146 | Acs15,Adk,Adora2a,Adra2c,Ank3,Anp32b,Arrb2,Avp,Axin2,Bmp6,C4a,Capn3,Cbx7,Cdc20,Cebpe,Celsr3,Chad,Chd6,Crip1,Csdc2,Dapk3,Dlg4,Dnmt3a,Dnmt3l,Dpf1,Dyx1c1,Elavl2,Ezr,Fam129b,Fbx15,Fgfr4,Foxg1,Galr3,Gata2,Gdf6,Gfi1,Grb7,Hgf,Hnf1a,Inpp1,Jak3,Kcne2,Kdm8,Lrrtm4,Map2k1,Mbnl2,Mefv,Mical2,Myc,Nfe2,Nolc1,Nos3,Nr3c1,Ntrk2,Pax8,Pcsk9,Phox2a,Pif1,PPP1r15a,PPP1r15a,Prkaca,Rasgrp1,Rere,Rnf187,S1pr1,Sbno1,Sh3gl2,Sh3rf2,Src,Stk24,Taf6,Tbx3,Tbx5,Tdrd7,Tgfb3,Tgfb2,Tle3,Tox2,Tsks,Uncx,Usp7,Zbtb42,Zbtb8a,Zfp37,Zfp90 |
| GO:0051962 | positive regulation of nervous system development         | 21 | 336  | 0.0146 | Adra2c, Bmp6, Brinp3, Cdc20, Dbn1, Dlg4, Elavl2, Gata2, Gdf6, Hgf, Mag, Mapt, Myc, Nr3c1, Nrxn1, Ntrk2, Pacsin1, Ppp1cc, RGD1311558, Shank1, Stk24                                                                                                                                                                                                                                                                                                                                                                 |
| GO:0071495 | cellular response to endogenous stimulus                  | 36 | 735  | 0.0149 | Acs15,Arrb2,Atp1a3,Bmp6,Cacna1g,Capn2,Dbn1,Dnmt3a,Elavl2,Ezr,Fgf12,Fgfr4,Gdf6,Igfals,Itpr3,Mtr,Myc,Nos3,Nr3c1,Ntrk2,Pax8,Pcsk9,Pkm,Pla2g1b,Plod1,Plod3,Por,PPP1r15a,Rab31,Sh3gl2,Src,Sstr2,Tgfb3,Tgfb2,Trpm2,Ucp3                                                                                                                                                                                                                                                                                                  |
| GO:0007165 | signal transduction                                       | 72 | 1825 | 0.0158 | Adam15,Adora2a,Adra2c,Ank3,Arhgap27,Arhgef28,Arrb2,Atp1a3,Avp,Axin2,Bmp6,Cd8a,Celsr2,Celsr3,Chad,Crip1,Csnk1,g2,Dapk3,Dgkg,Dok3,ENSRNOG0000050782,Ezr,Far2,Fgf12,Fgfr4,Fzd9,Galr3,Gdf6,Gnb2,Gng7,Gpr157,Gpr6,Grasp,Grb7,Grid1,Grik3,Grm4,Hgf,Hnf1a,Itpr3,Jak3,Limk2,Lrrtm4,Lzts2,Map2k1,Mapt,Matk,Myc,Nos3,Nr3c1,Nrg2,Nrxn1,Ntrk2,Palm,PPP1r15a,RGD1311558,Rab3a,Rasgrp1,Rassf9,Rita1,S1pr1,Sh3bp1,Src,Sstr2,Stk24,Tgfb3,Tgfb2,Tle3,Trpm2,Unc13a,Unc5a,Vegfb                                                       |
| GO:0048666 | neuron development                                        | 22 | 364  | 0.0158 | Adora2a, Celsr2, Celsr3, Dgkg, Dlg4, Dpys15, Gata2, Grm4, Igsf9, Llg1, Map2k1, Mapt, Ntrk2, Pacsin1, RGD1311558, Rab3a, Rere, Sh3gl2, Shank1, Stk24, Unc5a, Vapa                                                                                                                                                                                                                                                                                                                                                   |
| GO:0048732 | gland development                                         | 18 | 267  | 0.0158 | Aldh1a3,Arf6,Cbx7,Crip1,Gata2,Hgf,Hnf1a,Myc,Pax8,Pcsk9,Pkm,Pou2f1,Slc25a4,Src,Tbx3,Tgfb3,Tgfb2,Vwf                                                                                                                                                                                                                                                                                                                                                                                                                 |
| GO:0051240 | positive regulation of multicellular organismal process   | 39 | 823  | 0.0158 | Adk,Adora2a,Adra2c,Arrb2,Avp,Bmp6,Brinp3,Cdc20,Dbn1,Dlg4,Elavl2,Ezr,Far2,Fzd9,Gata2,Gdf6,Hgf,Mapt,Map2k1,Mapt,Myc,Nr3c1,Nrxn1,Ntrk2,Pacsin1,Pax8,Por,PPP1cc,RGD1311558,Rasgrp1,Scn5a,Shank1,Slc25a4,Src,Stk24,Tbx5,Tgfb3,Tgfb2,Vegfb                                                                                                                                                                                                                                                                               |
| GO:0097435 | supramolecular fiber organization                         | 14 | 177  | 0.0158 | Actn1,Arpc1a,Capn3,Dbn1,Ezr,Mical2,Msrb2,Pacsin1,Plod3,RGD1311558,Sh3bp1,Sorbs2,Src,Tppp3                                                                                                                                                                                                                                                                                                                                                                                                                          |
| GO:0010468 | regulation of gene expression                             | 60 | 1458 | 0.0172 | Adk,Adora2a,Ank3,Arrb2,Avp,Bmp6,Capn3,Cbx7,Cebpe,Chd6,Csdc2,Dapk3,Dnmt3a,Dpf1,Ezr,Fam129b,Fbx15,Fgfr4,Foxg1,Galr3,Gata2,Gdf6,Gfi1,Grb7,Hnf1a,Kdm8,Map2k1,Mbnl2,Mical2,Myc,Nfe2,Nolc1,Nr3c1,Ntrk2,Pax8,Phox2a,Pou2f1,PPP1cc,PPP1r15a,Rere,Rnf187,S1pr1,Sbno1,Src,Taf6,Tbx3,Tbx5,Tdrd7,Tgfb3,Tgfb2,Tle3,Tox2,Uncx,Usp7,Zbtb42,Zbtb8a,Zfp37,Zfp90                                                                                                                                                                     |
| GO:0051050 | positive regulation of transport                          | 30 | 578  | 0.0172 | Acs15,Adora2a,Ank3,Arrb2,Avp,Bmp6,Cacna1g,Cacna2d1,Capn3,Ezr,Far2,Fgf12,Fgf14,Gata2,Jak3,Kcne2,Nell2,Nr3c1,Pcsk9,Rab3a,Rasgrp1,Rbp4,Scn5a,Slc25a4,Src,Stim1,Syt3,Tgfb3,Trpm2                                                                                                                                                                                                                                                                                                                                       |
| GO:2000112 | regulation of cellular macromolecule biosynthetic process | 55 | 1309 | 0.0183 | Adora2a,Arrb2,Bmp6,Capn3,Cbx7,Cebpe,Chd6,Csdc2,Dapk3,Dnmt3a,Dpf1,Ezr,Fam129b,Fbx15,Fgfr4,Foxg1,Galr3,Gata2,Gdf6,Gfi1,Grb7,Hgf,Hnf1a,Inpp1,Jak3,Kdm8,Map2k1,Mical2,Myc,Nfe2,Nolc1,Nr3c1,Pax8,Phox2a,Pif1,Pom1,Pou2f1,PPP1r15a,Rere,Rnf187,S1pr1,Sbno1,Src,Taf6,Tbx3,Tbx5,Tgfb3,Tle3,Tox2,Uncx,Usp7,Zbtb42,Zbtb8a,Zfp37,Zfp90                                                                                                                                                                                        |
| GO:0031326 | regulation of cellular biosynthetic process               | 59 | 1434 | 0.0187 | Acs15,Adora2a,Arrb2,Avp,Bmp6,Capn3,Cbx7,Cebpe,Chd6,Csdc2,Dapk3,Dnmt3a,Dpf1,Ezr,Fam129b,Fbx15,Fgfr4,Foxg1,Galr3,Gata2,Gdf6,Gfi1,Grb7,Hgf,Hnf1a,Inpp1,Jak3,Kdm8,Map2k1,Mical2,Myc,Nfe2,Nolc1,Nos3,Nr3c1,Pax8,Phox2a,Pif1,Pom1,Por,Pou2f1,PPP1r15a,Rere,Rnf187,S1pr1,Sbno1,Src,Taf6,Tbx3,Tbx5,Tgfb3,Tle3,Tox2,Uncx,Usp7,Zbtb42,Zbtb8a,Zfp37,Zfp90                                                                                                                                                                     |
| GO:0071310 | cellular response to organic substance                    | 49 | 1129 | 0.0187 | Acs15,Adam15,Arrb2,Atp1a3,Axin2,Bmp6,Brinp3,Cacna1g,Capn2,Cebpe,Chad,Dapk3,Dbn1,Dnmt3a,Elavl2,Ezr,Far2,Fgf12,Fgfr4,Gdf6,Gfi1,Hgf,Igfals,Itpr3,Jak3,Lrrtm4,Mtr,Myc,Nos3,Nr3c1,Ntrk2,Pax8,Pcsk9,Pkm,Pla2g1b,Plod1,Plod3,Pom1,Por,PPP1r15a,Rab31,Sh3gl2,Src,Sstr2,Tgfb3,Tgfb2,Trpm2,Ucp3,Vwf                                                                                                                                                                                                                          |



|                   |                                                                |           |            |               |                                                                                                                                                                                                                                                                                                                                                                                                                                                                                                         |
|-------------------|----------------------------------------------------------------|-----------|------------|---------------|---------------------------------------------------------------------------------------------------------------------------------------------------------------------------------------------------------------------------------------------------------------------------------------------------------------------------------------------------------------------------------------------------------------------------------------------------------------------------------------------------------|
| GO:0010557        | positive regulation of macromolecule biosynthetic process      | 33        | 666        | 0.019         | Arb2,Bmp6,Capn3,Cbx7,Cebpe,Chd6,Fam129b,Fgfr4,Galr3,Gata2,Gdf6,Hgf,Hnf1a,Jak3,Kdm8,Map2k1,Mical2,Myc,Nfe21,Nolc1,Nr3c1,Pax8,Phox2a,Pomt1,Rere,Rnf187,S1pr1,Src,Tbx3,Tbx5,Tgfb3,Tox2,Zfp90                                                                                                                                                                                                                                                                                                               |
| GO:0007204        | positive regulation of cytosolic calcium ion concentration     | 14        | 183        | 0.0193        | Avp,Cacna1a,Cacna1g,Cacna1i,Cacna2d1,Capn3,Dlg4,Gata2,Gpr157,Gpr6,Itp3,Jak3,S1pr1,Trpm2                                                                                                                                                                                                                                                                                                                                                                                                                 |
| GO:0045597        | positive regulation of cell differentiation                    | 27        | 504        | 0.0196        | Adra2c,Arb2,Bmp6,Brinp3,Dbn1,Dlg4,Elavl2,Gata2,Gdf6,Hgf,Mag,Mapt,Myc,Nr3c1,Ntrk2,Pacsin1,Pax8,Por,Ppp1cc,RGD1311558,Rasgrp1,Shank1,Slc25a4,Stk24,Tbx5,Tgfb3,Tgfb2                                                                                                                                                                                                                                                                                                                                       |
| GO:0045893        | positive regulation of transcription, DNA-templated            | 27        | 504        | 0.0196        | Bmp6,Capn3,Cbx7,Cebpe,Chd6,Fam129b,Galr3,Gata2,Gdf6,Hnf1a,Kdm8,Map2k1,Mical2,Myc,Nfe21,Nolc1,Nr3c1,Pax8,Phox2a,Rnf187,S1pr1,Src,Tbx3,Tbx5,Tgfb3,Tox2,Zfp90                                                                                                                                                                                                                                                                                                                                              |
| GO:2000278        | regulation of DNA biosynthetic process                         | 7         | 50         | 0.0202        | Arb2,Fam129b,Fgfr4,Hgf,Myc,Pif1,Src                                                                                                                                                                                                                                                                                                                                                                                                                                                                     |
| <b>GO:0050769</b> | <b>positive regulation of neurogenesis</b>                     | <b>19</b> | <b>302</b> | <b>0.0211</b> | <b>Adra2c,Bmp6,Brinp3,Dbn1,Dlg4,Elavl2,Gata2,Gdf6,Hgf,Mag,Mapt,Myc,Nr3c1,Ntrk2,Pacsin1,Ppp1cc,RGD1311558,Shank1,Stk24</b>                                                                                                                                                                                                                                                                                                                                                                               |
| GO:0009888        | tissue development                                             | 30        | 591        | 0.0221        | Adam15,Bmp6,Chad,Chst11,Crip1,Ezr,Fbx15,Fzd9,Hgf,Hnf1a,Kazn,Lfng,Mical2,Msi1,Myc,Ninj1,Nolc1,Pax8,Pkm,Plec,Plo d3,S1pr1,Sh3bp1,Sorbs2,Src,Stim1,Tbx3,Tbx5,Tdrd7,Tgfb2                                                                                                                                                                                                                                                                                                                                   |
| GO:0042981        | regulation of apoptotic process                                | 35        | 731        | 0.0221        | Adora2a,Anp32b,Arb2,Avp,Bmp6,Capn3,Chst11,Cln8,Dapk3,Dyrk3,Fam129b,Fzd9,Gata2,Gdf6,Grina,Grm4,Hgf,Jak3,Map2k1,Myc,Nos3,Ntrk2,Pax8,Pcsk9,Por,Ppp1r15a,Siah1,Slc25a4,Src,Stk24,Stpg1,Tbx3,Tgfb3,Usp7                                                                                                                                                                                                                                                                                                      |
| GO:0031323        | regulation of cellular metabolic process                       | 83        | 2217       | 0.0224        | Acs15,Adora2a,Adra2c,Arb2,Avp,Axin2,Bmp6,C4a,Capn3,Cbx7,Cdc20,Cebpe,Celsr3,Chad,Chd6,Csdc2,Dapk3,Dlg4,Dnmt3a,Dnmt3l,Dpf1,Dyx1c1,Elavl2,Ezr,Fam129b,Fbx15,Fgfr4,Foxg1,Galr3,Gata2,Gdf6,Gfi1,Grb7,Hgf,Hnf1a,Inpp1,Jak3,Kcne2,Kdm8,Lrrtm4,Map2k1,Mbnl2,Mefv,Mical2,Myc,Nfe21,Nolc1,Nos3,Nr3c1,Ntrk2,Pax8,Pcsk9,Phox2a,Pif1,Pomt1,Por,Pou2f1,Ppp1r14a,Ppp1r15a,Prkaca,Rasgrp1,Rere,Rnf187,S1pr1,Sbno1,Sh3gl2,Sh3rf2,Src,Stk24,Taf6,Tbx3,Tbx5,Tgfb3,Tgfb2,Tle3,Tox2,Tsks,Uncx,Usp7,Zbtb42,Zbtb8a,Zfp37,Zfp90 |
| GO:0051171        | regulation of nitrogen compound metabolic process              | 79        | 2091       | 0.0235        | Adora2a,Adra2c,Anp32b,Arb2,Avp,Axin2,Bmp6,C4a,Capn3,Cbx7,Cdc20,Cebpe,Celsr3,Chad,Chd6,Csdc2,Dapk3,Dlg4,Dnmt3a,Dnmt3l,Dpf1,Dyx1c1,Elavl2,Ezr,Fam129b,Fbx15,Fgfr4,Foxg1,Galr3,Gata2,Gdf6,Gfi1,Grb7,Hgf,Hnf1a,Inpp1,Jak3,Kcne2,Kdm8,Lrrtm4,Map2k1,Mbnl2,Mical2,Myc,Nfe21,Nolc1,Nos3,Nr3c1,Ntrk2,Pax8,Pcsk9,Phox2a,Pif1,Pomt1,Por,Pou2f1,Ppp1r14a,Ppp1r15a,Rasgrp1,Rere,Rnf187,S1pr1,Sbno1,Sh3rf2,Src,Stk24,Taf6,Tbx3,Tbx5,Tgfb3,Tgfb2,Tle3,Tox2,Uncx,Usp7,Zbtb42,Zbtb8a,Zfp37,Zfp90                        |
| GO:0019219        | regulation of nucleobase-containing compound metabolic process | 55        | 1333       | 0.0243        | Adora2a,Arb2,Bmp6,Capn3,Cbx7,Cebpe,Chd6,Csdc2,Dapk3,Dnmt3a,Dnmt3l,Dpf1,Elavl2,Ezr,Fam129b,Fbx15,Fgfr4,Foxg1,Galr3,Gata2,Gdf6,Gfi1,Hgf,Hnf1a,Inpp1,Kdm8,Map2k1,Mbnl2,Mical2,Myc,Nfe21,Nolc1,Nos3,Nr3c1,Pax8,Phox2a,Pif1,Pou2f1,Rere,Rnf187,S1pr1,Sbno1,Src,Taf6,Tbx3,Tbx5,Tgfb3,Tle3,Tox2,Uncx,Usp7,Zbtb42,Zbtb8a,Zfp37,Zfp90                                                                                                                                                                            |
| <b>GO:0031175</b> | <b>neuron projection development</b>                           | <b>19</b> | <b>307</b> | <b>0.0243</b> | <b>Adora2a,Celsr2,Celsr3,Dlg4,Dpys15,Grm4,Igsf9,Llg1,Map2k1,Mapt,Pacsin1,RGD1311558,Rab3a,Rere,Sh3gl2,Shank1,Stk24,Unc5a,Vapa</b>                                                                                                                                                                                                                                                                                                                                                                       |
| GO:1901385        | regulation of voltage-gated calcium channel activity           | 5         | 24         | 0.0243        | Cabp1,Cacna1a,Cacna2d1,Fgf14,Kcne2                                                                                                                                                                                                                                                                                                                                                                                                                                                                      |
| GO:1903508        | positive regulation of nucleic acid-templated transcription    | 28        | 543        | 0.0248        | Bmp6,Capn3,Cbx7,Cebpe,Chd6,Fam129b,Galr3,Gata2,Gdf6,Hnf1a,Kdm8,Map2k1,Mical2,Myc,Nfe21,Nolc1,Nr3c1,Pax8,Phox2a,Rere,Rnf187,S1pr1,Src,Tbx3,Tbx5,Tgfb3,Tox2,Zfp90                                                                                                                                                                                                                                                                                                                                         |
| <b>GO:0007420</b> | <b>brain development</b>                                       | <b>24</b> | <b>437</b> | <b>0.0252</b> | <b>Aldh1a3,Arb2,Atat1,Atp1a3,Cdh22,Dbn1,Foxg1,Gata2,Inpp1,Mapt,Myc,Nr3c1,Nrxn1,Ntrk2,Pomk,Rere,Rogdi,S1pr1,Scn5a,Src,Sstr2,Synj2,Tbx3,Tgfb2</b>                                                                                                                                                                                                                                                                                                                                                         |
| GO:0010720        | positive regulation of cell development                        | 20        | 334        | 0.0252        | Adra2c,Bmp6,Brinp3,Dbn1,Dlg4,Elavl2,Gata2,Gdf6,Hgf,Mag,Mapt,Myc,Nr3c1,Ntrk2,Pacsin1,Ppp1cc,RGD1311558,Shank1,Slc25a4,Stk24                                                                                                                                                                                                                                                                                                                                                                              |
| GO:0050801        | ion homeostasis                                                | 24        | 437        | 0.0252        | Ank3,Atp1a3,Avp,Bmp6,Cacna1a,Cacna1g,Cacna1i,Cacna2d1,Capn3,Dlg4,Fgf12,Fgfr4,Gata2,Gpr157,Gpr6,Grina,Itp3,Jak3,Myc,S1pr1,Scn5a,Src,Stim1,Trpm2                                                                                                                                                                                                                                                                                                                                                          |
| GO:0010941        | regulation of cell death                                       | 38        | 829        | 0.0258        | Adora2a,Anp32b,Arb2,Avp,Bmp6,Capn3,Chst11,Cln8,Dapk3,Dnmt3a,Dyrk3,Fam129b,Fzd9,Gata2,Gdf6,Grina,Grm4,Hgf,Jak3,Lzts2,Mag,Map2k1,Myc,Nos3,Ntrk2,Pax8,Pcsk9,Por,Ppp1r15a,Siah1,Slc25a4,Src,Stk24,Stpg1,Tbx3,Tgfb3,Trpm2,Usp7                                                                                                                                                                                                                                                                               |
| <b>GO:0060074</b> | <b>synapse maturation</b>                                      | <b>3</b>  | <b>5</b>   | <b>0.0258</b> | <b>Nrxn1,Palm,Shank1</b>                                                                                                                                                                                                                                                                                                                                                                                                                                                                                |
| GO:0006875        | cellular metal ion homeostasis                                 | 19        | 313        | 0.0276        | Atp1a3,Avp,Bmp6,Cacna1a,Cacna1g,Cacna1i,Cacna2d1,Capn3,Dlg4,Gata2,Gpr157,Gpr6,Grina,Itp3,Jak3,Myc,S1pr1,Stim1,Trpm2                                                                                                                                                                                                                                                                                                                                                                                     |
| GO:0051128        | regulation of cellular component organization                  | 46        | 1073       | 0.0283        | Adam15,Arf6,Arcp1a,Arb2,Atat1,Avp,Capn2,Cdc20,Csnk1g2,Dapk3,Dbn1,Dlg4,Elavl2,Ezr,Fgfr4,Fzd9,Gata2,Gfi1,Hgf,Igfbp6,Igsf9,Inpp1,Mag,Map2k1,Mapt,Mefv,Myc,Nr3c1,Nrxn1,Ntrk2,Pacsin1,Palm,Pcsk9,Pif1,RGD1311558,Rab3a,S1pr1,Sh3gl2,Shank1,Slc25a4,Src,Stk24,Ston2,Syt3,Tgfb3,Trpm2                                                                                                                                                                                                                          |
| <b>GO:0045666</b> | <b>positive regulation of neuron differentiation</b>           | <b>16</b> | <b>242</b> | <b>0.0289</b> | <b>Adra2c,Bmp6,Brinp3,Dbn1,Dlg4,Elavl2,Gata2,Gdf6,Hgf,Mapt,Nr3c1,Ntrk2,Pacsin1,RGD1311558,Shank1,Stk24</b>                                                                                                                                                                                                                                                                                                                                                                                              |

|            |                                                                                           |     |      |        |                                                                                                                                                                                                                                                                                                                                                                                                                                                                                                                                                                                                                                                                  |
|------------|-------------------------------------------------------------------------------------------|-----|------|--------|------------------------------------------------------------------------------------------------------------------------------------------------------------------------------------------------------------------------------------------------------------------------------------------------------------------------------------------------------------------------------------------------------------------------------------------------------------------------------------------------------------------------------------------------------------------------------------------------------------------------------------------------------------------|
| GO:0010628 | positive regulation of gene expression                                                    | 33  | 693  | 0.029  | Ank3,Arrb2,Avp,Bmp6,Capn3,Cbx7,Cebpe,Chd6,Ezr,Fam129b,Fgfr4,Galr3,Gata2,Gdf6,Hnf1a,Kdm8,Map2k1,Mical2,Myc,Nfe2,Nolc1,Nr3c1,Ntrk2,Pax8,Phox2a,Rnf187,S1pr1,Src,Tbx3,Tbx5,Tgfb3,Tox2,Zfp90                                                                                                                                                                                                                                                                                                                                                                                                                                                                         |
| GO:0030036 | actin cytoskeleton organization                                                           | 14  | 197  | 0.0301 | Actn1,Arf6,Arpc1a,Capn3,Dbn1,Ezr,Mical2,Msrb2,Pacsin1,REGD1311558,S1pr1,Sh3bp1,Sorbs2,Src                                                                                                                                                                                                                                                                                                                                                                                                                                                                                                                                                                        |
| GO:0048562 | embryonic organ morphogenesis                                                             | 8   | 73   | 0.0301 | Chst11,Gata2,Mical2,Pax8,Slc39a3,Tbx3,Tgfb3,Tgfb2                                                                                                                                                                                                                                                                                                                                                                                                                                                                                                                                                                                                                |
| GO:0055065 | metal ion homeostasis                                                                     | 20  | 342  | 0.0301 | Ank3,Atp1a3,Avp,Bmp6,Cacna1a,Cacna1g,Cacna1i,Cacna2d1,Capn3,Dlg4,Gata2,Gpr157,Gpr6,Grina,Itrp3,Jak3,Myc,S1pr1,Stim1,Trpm2                                                                                                                                                                                                                                                                                                                                                                                                                                                                                                                                        |
| GO:0007178 | transmembrane receptor protein serine/threonine kinase signaling pathway                  | 8   | 74   | 0.032  | Arrb2,Bmp6,Gdf6,Hnf1a,Ntrk2,Src,Tgfb3,Tgfb2                                                                                                                                                                                                                                                                                                                                                                                                                                                                                                                                                                                                                      |
| GO:0001763 | morphogenesis of a branching structure                                                    | 7   | 57   | 0.0328 | Hgf,Myc,Pax8,Rere,Src,Tbx3,Tgfb2                                                                                                                                                                                                                                                                                                                                                                                                                                                                                                                                                                                                                                 |
| GO:0080090 | regulation of primary metabolic process                                                   | 80  | 2165 | 0.0335 | Acs15,Adora2a,Adra2c,Anp32b,Arrb2,Avp,Axin2,Bmp6,C4a,Capn3,Cbx7,Cdc20,Cebpe,Celsr3,Chad,Chd6,Csdc2,Dapk3,Dlg4,Dnmt3a,Dnmt3l,Dpf1,Dyx1c1,Elavl2,Ezr,Fam129b,Fbx15,Fgfr4,Foxg1,Galr3,Gata2,Gdf6,Gfi1,Grb7,Hgf,Hnf1a,Inpp1,Jak3,Kcne2,Kdm8,Lrrtm4,Map2k1,Mbnl2,Mical2,Myc,Nfe2,Nolc1,Nos3,Nr3c1,Ntrk2,Pax8,Pcsk9,Phox2a,Pif1,Pomt1,Por,Pou2f1,Ppp1r14a,Ppp1r15a,Rasgrp1,Rere,Rnf187,S1pr1,Sbno1,Sh3rf2,Src,Stk24,Taf6,Tbx3,Tbx5,Tgfb3,Tgfb2,Tle3,Tox2,Uncx,Usp7,Zbtb42,Zbtb8a,Zfp37,Zfp90                                                                                                                                                                           |
| GO:0003376 | sphingosine-1-phosphate receptor signaling pathway                                        | 3   | 6    | 0.0339 | Ezr,Gpr6,S1pr1                                                                                                                                                                                                                                                                                                                                                                                                                                                                                                                                                                                                                                                   |
| GO:0055085 | transmembrane transport                                                                   | 34  | 731  | 0.0339 | Abcd2,Asic4,Atp1a3,Cacna1a,Cacna1g,Cacna1i,Cacna2d1,Cacna2d2,Cln8,Grid1,Grik3,Grina,Hnf1a,Itrp3,Kcne2,Kcng1,Kcni1,Kcni4,Kcnj4,Kcnk1,Kcnmb4,Myc,Psd,Rbp4,Scn5a,Slc10a4,Slc15a1,Slc25a4,Slc39a3,Slc3a2,Stim1,Svop,Trpm2,Ucp3                                                                                                                                                                                                                                                                                                                                                                                                                                       |
| GO:0048705 | skeletal system morphogenesis                                                             | 7   | 58   | 0.0347 | Bmp6,Chad,Chst11,Inpp1,Slc39a3,Tgfb3,Tgfb2                                                                                                                                                                                                                                                                                                                                                                                                                                                                                                                                                                                                                       |
| GO:0007156 | homophilic cell adhesion via plasma membrane adhesion molecules                           | 6   | 42   | 0.035  | Cdh22,Celsr2,Celsr3,Fat3,Gypc,Igsf9                                                                                                                                                                                                                                                                                                                                                                                                                                                                                                                                                                                                                              |
| GO:0043154 | negative regulation of cysteine-type endopeptidase activity involved in apoptotic process | 6   | 42   | 0.035  | Adora2a,Arrb2,Avp,Hgf,Por,Src                                                                                                                                                                                                                                                                                                                                                                                                                                                                                                                                                                                                                                    |
| GO:0033043 | regulation of organelle organization                                                      | 24  | 455  | 0.0355 | Arf6,Arpc1a,Arrb2,Atat1,Avp,Capn2,Cdc20,Dapk3,Dbn1,Ezr,Gata2,Gfi1,Hgf,Map2k1,Mapt,Myc,Pif1,Rab3a,S1pr1,Shank1,Src,Syt3,Tgfb3,Trpm2                                                                                                                                                                                                                                                                                                                                                                                                                                                                                                                               |
| GO:0043066 | negative regulation of apoptotic process                                                  | 23  | 429  | 0.036  | Adora2a,Anp32b,Arrb2,Avp,Capn3,Chst11,Cln8,Dyrk3,Fam129b,Fzd9,Gata2,Grina,Grm4,Hgf,Jak3,Mag,Map2k1,Ntrk2,Pax8,Por,Slc25a4,Src,Tbx3                                                                                                                                                                                                                                                                                                                                                                                                                                                                                                                               |
| GO:0006807 | nitrogen compound metabolic process                                                       | 108 | 3120 | 0.0378 | Acs15,Adam15,Adk,Amz2,Arrb2,Atat1,Avp,B4galnt1,B4galnt4,Bop1,C4a,Capn11,Capn2,Capn3,Cbx7,Cdc20,Cebpe,Chd6,Chst11,Cln8,Cpa2,Csdc2,Csnk1g2,Ctrc,Dapk3,Diexf,Dk1,Dlg4,Dnmt3a,Dnmt3l,Dpf1,Dyrk3,ENSRNOG00000050782,Fbx15,Fgfr4,Foxg1,Fto,Gata2,Gdf6,Gfi1,Hal,Hgf,Hipk4,Hnf1a,Jak3,Kdm8,Lfng,Limk2,Map2k1,Masp1,Matk,Mbnl2,Mmp24,Msrb2,Mtr,Myc,Nfe2,Nmnat2,Nolc1,Nos3,Nr3c1,Nrg2,Ntrk2,Oplah,Pax8,Pcsk4,Pcsk9,Pgc,Phox2a,Pif1,Pkm,Pla2g1b,Plod1,Plod3,Pomk,Pomt1,Por,Pou2f1,Ppp1cc,Prkaca,Qtrt1,Repin1,Rere,Rnf182,Rnf187,Rnf44,Rpl35a,Sh3rf2,Siah1,Src,Stk24,Taf6,Tbx3,Tbx5,Tgfb2,Tle3,Tmem14c,Tox2,Trim63,Trmt11,U2af1l4,Uncx,Usp7,Zbtb42,Zbtb8a,Zdhc22,Zfp37,Zfp90 |
| GO:0044057 | regulation of system process                                                              | 21  | 378  | 0.0378 | Adk,Adora2a,Adra2c,Avp,Bmp6,Cacna1g,Cacna2d2,Dbn1,Dlg4,Fgf12,Hgf,Kcne2,Mag,Map2k1,Nr3c1,Nrxn1,Scn5a,Shank1,Slc25a4,Sstr2,Trim63                                                                                                                                                                                                                                                                                                                                                                                                                                                                                                                                  |
| GO:0048701 | embryonic cranial skeleton morphogenesis                                                  | 4   | 16   | 0.0378 | Chst11,Slc39a3,Tgfb3,Tgfb2                                                                                                                                                                                                                                                                                                                                                                                                                                                                                                                                                                                                                                       |
| GO:0048167 | regulation of synaptic plasticity                                                         | 11  | 138  | 0.039  | Adora2a,Bcan,Cabp1,Cdc20,Dlg4,Fgf14,Mapt,Nr3c1,Ppfia3,Rab3a,Unc13a                                                                                                                                                                                                                                                                                                                                                                                                                                                                                                                                                                                               |
| GO:0072507 | divalent inorganic cation homeostasis                                                     | 17  | 278  | 0.0394 | Ank3,Avp,Cacna1a,Cacna1g,Cacna1i,Cacna2d1,Capn3,Dlg4,Gata2,Gpr157,Gpr6,Grina,Itrp3,Jak3,S1pr1,Stim1,Trpm2                                                                                                                                                                                                                                                                                                                                                                                                                                                                                                                                                        |
| GO:0007368 | determination of left/right symmetry                                                      | 5   | 29   | 0.0399 | Drc1,Dyx1c1,Mical2,Tbx3,Tgfb2                                                                                                                                                                                                                                                                                                                                                                                                                                                                                                                                                                                                                                    |
| GO:0035418 | protein localization to synapse                                                           | 5   | 29   | 0.0399 | Anks1b,Dlg4,Klc1,Nrxn1,Shank1                                                                                                                                                                                                                                                                                                                                                                                                                                                                                                                                                                                                                                    |

|            |                                                                    |           |            |               |                                                                                                                                                                                                                                                                                                                                                                                                                                                                                                                                                                                                                                                                                                                 |
|------------|--------------------------------------------------------------------|-----------|------------|---------------|-----------------------------------------------------------------------------------------------------------------------------------------------------------------------------------------------------------------------------------------------------------------------------------------------------------------------------------------------------------------------------------------------------------------------------------------------------------------------------------------------------------------------------------------------------------------------------------------------------------------------------------------------------------------------------------------------------------------|
| GO:0006355 | regulation of transcription, DNA-templated                         | 47        | 1135       | 0.0413        | Adora2a,Arrb2,Bmp6,Capn3,Cbx7,Cebpe,Chd6,Csdc2,Dapk3,Dnmt3a,Dpf1,Ezr,Fam129b,Fbx15,Foxg1,Galr3,Gata2,Gdf6,Gfi1,Hnf1a,Kdm8,Map2k1,Mical2,Myc,Nfe2,Nolc1,Nr3c1,Pax8,Phox2a,Pou2f1,Rere,Rnf187,S1pr1,Sbno1,Src,Taf6,Tbx3,Tbx5,Tgfb3,Tle3,Tox2,Uncx,Usp7,Zbtb42,Zbtb8a,Zfp37,Zfp90                                                                                                                                                                                                                                                                                                                                                                                                                                  |
| GO:0031325 | positive regulation of cellular metabolic process                  | 51        | 1259       | 0.0413        | Acs15,Adra2c,Arrb2,Avp,Axin2,Bmp6,Capn3,Cbx7,Cdc20,Cebpe,Chd6,Dlg4,Dnmt31,Ezr,Fam129b,Fgfr4,Galr3,Gata2,Gdf6,Hgf,Hnf1a,Kcne2,Kdm8,Map2k1,Mefv,Mical2,Myc,Nfe2,Nolc1,Nos3,Nr3c1,Ntrk2,Pax8,Pcsk9,Phox2a,Pom1,Por,Ppp1r15a,Rasgrp1,Rere,Rnf187,S1pr1,Src,Stk24,Tbx3,Tbx5,Tgfb3,Tgfb2,Tox2,Usp7,Zfp90                                                                                                                                                                                                                                                                                                                                                                                                              |
| GO:0044092 | negative regulation of molecular function                          | 25        | 490        | 0.0413        | Adam15,Adora2a,Ank3,Arrb2,Avp,C4a,Cabp1,Chad,Dbn1,Fgf12,Galr3,Gfi1,Hgf,Inpp1,Kcne2,Lrrtm4,Palm,Pcsk9,Pif1,Por,Ppp1r14a,Sh3rf2,Src,Tsk3,Zfp90                                                                                                                                                                                                                                                                                                                                                                                                                                                                                                                                                                    |
| GO:0006897 | endocytosis                                                        | 14        | 209        | 0.0421        | Arhgap27,Arrb2,Cebpe,Csnk1g2,Ezr,Gata2,Hare,Pacsin1,Pip5k1c,Rab31,Sh3bp1,Sh3gl2,Ston2,Tgfb2                                                                                                                                                                                                                                                                                                                                                                                                                                                                                                                                                                                                                     |
| GO:0018108 | peptidyl-tyrosine phosphorylation                                  | 8         | 80         | 0.0421        | Dyrk3,Fgfr4,Jak3,Map2k1,Matk,Nrg2,Ntrk2,Src                                                                                                                                                                                                                                                                                                                                                                                                                                                                                                                                                                                                                                                                     |
| GO:0032332 | positive regulation of chondrocyte differentiation                 | 3         | 7          | 0.0421        | Bmp6,Gdf6,Por                                                                                                                                                                                                                                                                                                                                                                                                                                                                                                                                                                                                                                                                                                   |
| GO:0045664 | <b>regulation of neuron differentiation</b>                        | <b>21</b> | <b>384</b> | <b>0.0421</b> | <b>Adra2c,Arf6,Bmp6,Brinp3,Cdc20,Dbn1,Dlg4,Elavl2,Gata2,Gdf6,Gfi1,Hgf,Inpp1,Mag,Mapt,Nr3c1,Ntrk2,Pacsin1,RG D1311558,Shank1,Stk24</b>                                                                                                                                                                                                                                                                                                                                                                                                                                                                                                                                                                           |
| GO:0051254 | positive regulation of RNA metabolic process                       | 28        | 575        | 0.0421        | Bmp6,Capn3,Cbx7,Cebpe,Chd6,Fam129b,Galr3,Gata2,Gdf6,Hnf1a,Kdm8,Map2k1,Mical2,Myc,Nfe2,Nolc1,Nr3c1,Pax8,Phox2a,Rere,Rnf187,S1pr1,Src,Tbx3,Tbx5,Tgfb3,Tox2,Zfp90                                                                                                                                                                                                                                                                                                                                                                                                                                                                                                                                                  |
| GO:0051489 | regulation of filopodium assembly                                  | 5         | 30         | 0.0421        | Arf6,Dbn1,Nrxn1,Palm,Trpm2                                                                                                                                                                                                                                                                                                                                                                                                                                                                                                                                                                                                                                                                                      |
| GO:0071286 | cellular response to magnesium ion                                 | 3         | 7          | 0.0421        | Ank3,Nos3,Nr3c1                                                                                                                                                                                                                                                                                                                                                                                                                                                                                                                                                                                                                                                                                                 |
| GO:0120035 | regulation of plasma membrane bounded cell projection organization | 21        | 386        | 0.0425        | Arf6,Cdc20,Dbn1,Dlg4,Elavl2,Ezr,Gfi1,Hgf,Inpp1,Mag,Mapt,Nr3c1,Nrxn1,Ntrk2,Pacsin1,Palm,RGD1311558,Shank1,Src,Stk24,Trpm2                                                                                                                                                                                                                                                                                                                                                                                                                                                                                                                                                                                        |
| GO:1903532 | positive regulation of secretion by cell                           | 16        | 258        | 0.0425        | Adora2a,Avp,Bmp6,Cacna1g,Cacna1i,Ezr,Ffar2,Gata2,Neil2,Nr3c1,Rab3a,Rasgrp1,Rbp4,Src,Tgfb3,Trpm2                                                                                                                                                                                                                                                                                                                                                                                                                                                                                                                                                                                                                 |
| GO:0006874 | cellular calcium ion homeostasis                                   | 16        | 260        | 0.0452        | Avp,Cacna1a,Cacna1g,Cacna1i,Cacna2d1,Capn3,Dlg4,Gata2,Gpr157,Gpr6,Grina,Itp3r3,Jak3,S1pr1,Stim1,Trpm2                                                                                                                                                                                                                                                                                                                                                                                                                                                                                                                                                                                                           |
| GO:0048638 | regulation of developmental growth                                 | 12        | 166        | 0.0464        | Capn3,Dbn1,Ezr,Fto,Mag,Mapt,Nr3c1,Por,RGD1311558,Slc25a4,Tbx5,Tgfb2                                                                                                                                                                                                                                                                                                                                                                                                                                                                                                                                                                                                                                             |
| GO:0043009 | chordate embryonic development                                     | 12        | 167        | 0.0473        | Capn2,Chst11,Gata2,Hnf1a,Lfng,Myc,Nolc1,Plod3,Slc39a3,Tbx3,Tgfb3,Tgfb2                                                                                                                                                                                                                                                                                                                                                                                                                                                                                                                                                                                                                                          |
| GO:0001501 | skeletal system development                                        | 11        | 145        | 0.0478        | Bcan,Bmp6,Chad,Chst11,Inpp1,Nos3,Slc39a3,Src,Tbx3,Tgfb3,Tgfb2                                                                                                                                                                                                                                                                                                                                                                                                                                                                                                                                                                                                                                                   |
| GO:0043412 | macromolecule modification                                         | 46        | 1121       | 0.0478        | Arrb2,Atat1,Avp,B4galt4,Cdc20,Csnk1g2,Dapk3,Dk1,Dnmt3a,Dnmt31,Dyrk3,Fbx15,Fgfr4,Fto,Gdf6,Hipk4,Hnf1a,Jak3,Kdm8,Lfng,Limk2,Map2k1,Matk,Mtr,Myc,Nrg2,Ntrk2,Plod1,Plod3,Pomk,Pom1,Por,Ppp1cc,Prkaca,Qtrt1,Rnf182,Rnf187,Rnf44,Sh3rf2,Siah1,Src,Stk24,Tgfb2,Trim63,Usp7,Zdhhc22                                                                                                                                                                                                                                                                                                                                                                                                                                     |
| GO:0051173 | positive regulation of nitrogen compound metabolic process         | 48        | 1184       | 0.0478        | Adra2c,Arrb2,Avp,Axin2,Bmp6,Capn3,Cbx7,Cdc20,Cebpe,Chd6,Dlg4,Dnmt31,Ezr,Fam129b,Fgfr4,Galr3,Gata2,Gdf6,Hgf,Hnf1a,Kcne2,Kdm8,Map2k1,Mical2,Myc,Nfe2,Nolc1,Nos3,Nr3c1,Ntrk2,Pax8,Pcsk9,Phox2a,Pom1,Ppp1r15a,Rasgrp1,Rere,Rnf187,S1pr1,Src,Stk24,Tbx3,Tbx5,Tgfb3,Tgfb2,Tox2,Usp7,Zfp90                                                                                                                                                                                                                                                                                                                                                                                                                             |
| GO:0060548 | negative regulation of cell death                                  | 25        | 501        | 0.0478        | Adora2a,Anp32b,Arrb2,Avp,Capn3,Chst11,Cln8,Dyrk3,Fam129b,Fzd9,Gata2,Grina,Grm4,Hgf,Jak3,Mag,Map2k1,Myc,Ntrk2,Pax8,Por,Ppp1r15a,Slc25a4,Src,Tbx3                                                                                                                                                                                                                                                                                                                                                                                                                                                                                                                                                                 |
| GO:0044238 | primary metabolic process                                          | 116       | 3438       | 0.0481        | Abcd2,Acsf2,Acs15,Adam15,Adk,Aldh1a3,Amz2,Arrb2,Atat1,Avp,B4galnt1,B4galt4,Bop1,C4a,Capn11,Capn2,Capn3,Cbx7,Cdc20,Cebpe,Chd6,Chst11,Cln8,Cpa2,Csdc2,Csnk1g2,Ctrc,Dapk3,Dgkg,Diexf,Dk1,Dlg4,Dnmt3a,Dnmt31,Dpf1,Dyrk3,ENS,RNOG0000050782,Fbx15,Fgfr4,Foxg1,Fto,Gata2,Gdf6,Gfi1,Hal,Hgf,Hipk4,Hnf1a,Inpp1,Jak3,Kdm8,Lfng,Limk2,Map2k1,Masp1,Matk,Mbnl2,Mmp24,Msrp2,Mtr,Myc,Nfe2,Nmnat2,Nolc1,Nr3c1,Nrg2,Ntrk2,Pax8,Pcsk4,Pcsk9,Pcyt2,Pgc,Phox2a,Pif1,Pip5k1c,Pkm,Pla2g1b,Plod1,Plod3,Pomk,Pom1,Por,Pou2f1,Ppp1cc,Prkaca,Qtrt1,Rbp4,Repin1,Rere,Rnf182,Rnf187,Rnf44,Rpl35a,Sh3rf2,Siah1,Slc3a2,Src,Stk24,Synj2,Taf6,Tbx3,Tbx5,Tgfb2,Tle3,Tox2,Trim63,Trmt11,U2af14,Ucp3,Uncx,Usp7,Zbtb42,Zbtb8a,Zdhhc22,Zfp37,Zfp90 |
| GO:0016188 | <b>synaptic vesicle maturation</b>                                 | <b>3</b>  | <b>8</b>   | <b>0.049</b>  | <b>Dlg4,Rab3a,Unc13a</b>                                                                                                                                                                                                                                                                                                                                                                                                                                                                                                                                                                                                                                                                                        |
| GO:0051129 | negative regulation of cellular component organization             | 17        | 290        | 0.049         | Arf6,Arrb2,Avp,Dbn1,Dlg4,Fzd9,Gfi1,Hgf,Inpp1,Mag,Mefv,Nrxn1,Pcsk9,Pif1,S1pr1,Shank1,Src                                                                                                                                                                                                                                                                                                                                                                                                                                                                                                                                                                                                                         |

|            |                                                         |    |      |       |                                                                                                                                                                                                                                                                                                                                              |
|------------|---------------------------------------------------------|----|------|-------|----------------------------------------------------------------------------------------------------------------------------------------------------------------------------------------------------------------------------------------------------------------------------------------------------------------------------------------------|
| GO:0051252 | regulation of RNA metabolic process                     | 49 | 1219 | 0.049 | Adora2a, Arrb2, Bmp6, Capn3, Cbx7, Cebpe, Chd6, Csd2, Dapk3, Dnmt3a, Dpf1, Elavl2, Ezr, Fam129b, Fbxl15, Foxg1, Galr3, Gata2, Gdf6, Gfi1, Hnf1a, Kdm8, Map2k1, Mbnl2, Mical2, Myc, Nfe2, Nolc1, Nr3c1, Pax8, Phox2a, Pou2f1, Rere, Rnf187, S1pr1, Sbnol1, Src, Taf6, Tbx3, Tbx5, Tgfb3, Tle3, Tox2, Uncx, Usp7, Zbtb42, Zbtb8a, Zfp37, Zfp90 |
| GO:0098771 | inorganic ion homeostasis                               | 21 | 395  | 0.049 | Ank3, Atp1a3, Avp, Bmp6, Cacna1a, Cacna1g, Cacna1i, Cacna2d1, Capn3, Dlg4, Fgfr4, Gata2, Gpr157, Gpr6, Grina, Itpr3, Jak3, Myc, S1pr1, Stim1, Trpm2                                                                                                                                                                                          |
| GO:2000641 | regulation of early endosome to late endosome transport | 3  | 8    | 0.049 | Ezr, Map2k1, Src                                                                                                                                                                                                                                                                                                                             |

**Supplementary Table 3. Significant Biological Process GO terms for the seven genes of interest in this study.**

| #term ID   | term description                                                   | observed gene count | background gene count | false discovery rate | matching proteins in your network (labels) |
|------------|--------------------------------------------------------------------|---------------------|-----------------------|----------------------|--------------------------------------------|
| GO:0035176 | social behavior                                                    | 5                   | 50                    | 1.70E-09             | DLG4,GRID1,NRXN1,NRXN3,SHANK1              |
| GO:0071625 | vocalization behavior                                              | 4                   | 16                    | 3.87E-09             | DLG4,NRXN1,NRXN3,SHANK1                    |
| GO:0007612 | learning                                                           | 4                   | 137                   | 9.93E-06             | DLG4,NRXN1,NRXN3,SHANK1                    |
| GO:2000463 | positive regulation of excitatory postsynaptic potential           | 3                   | 26                    | 9.93E-06             | DLG4,NRXN1,SHANK1                          |
| GO:0035418 | protein localization to synapse                                    | 3                   | 40                    | 2.32E-05             | DLG4,NRXN1,SHANK1                          |
| GO:1900449 | regulation of glutamate receptor signaling pathway                 | 3                   | 41                    | 2.32E-05             | DLG4,NRXN1,SHANK1                          |
| GO:0099601 | regulation of neurotransmitter receptor activity                   | 3                   | 47                    | 2.77E-05             | DLG4,NRXN1,SHANK1                          |
| GO:0050885 | neuromuscular process controlling balance                          | 3                   | 49                    | 2.86E-05             | DLG4,NRXN1,SHANK1                          |
| GO:0099173 | postsynapse organization                                           | 3                   | 54                    | 3.28E-05             | DLG4,NRXN1,SHANK1                          |
| GO:2000821 | regulation of grooming behavior                                    | 2                   | 5                     | 7.56E-05             | DLG4,NRXN1                                 |
| GO:0072578 | neurotransmitter-gated ion                                         | 2                   | 7                     | 0.00012              | DLG4,NRXN1                                 |
| GO:0007268 | chemical synaptic transmission                                     | 4                   | 402                   | 0.00017              | DLG4,GRID1,NRXN1,SYT3                      |
| GO:0042391 | regulation of membrane potential                                   | 4                   | 408                   | 0.00017              | DLG4,GRID1,NRXN1,SHANK1                    |
| GO:0048667 | cell morphogenesis involved in neuron differentiation              | 4                   | 400                   | 0.00017              | DLG4,NRXN1,NRXN3,SHANK1                    |
| GO:0060074 | synapse maturation                                                 | 2                   | 9                     | 0.00017              | NRXN1,SHANK1                               |
| GO:0048812 | neuron projection morphogenesis                                    | 4                   | 448                   | 0.00019              | DLG4,NRXN1,NRXN3,SHANK1                    |
| GO:0007158 | neuron cell-cell adhesion                                          | 2                   | 14                    | 0.00021              | NRXN1,NRXN3                                |
| GO:0030534 | adult behavior                                                     | 3                   | 137                   | 0.00021              | NRXN1,NRXN3,SHANK1                         |
| GO:0051962 | positive regulation of nervous system development                  | 4                   | 488                   | 0.00021              | DLG4,NRXN1,SHANK1,SYT3                     |
| GO:0060997 | dendritic spine morphogenesis                                      | 2                   | 16                    | 0.00025              | DLG4,SHANK1                                |
| GO:2001257 | regulation of cation channel activity                              | 3                   | 152                   | 0.00025              | DLG4,NRXN1,SHANK1                          |
| GO:0050877 | nervous system process                                             | 5                   | 1271                  | 0.00031              | DLG4,GRID1,NRXN1,NRXN3,SHANK1              |
| GO:2000310 | regulation of NMDA receptor activity                               | 2                   | 20                    | 0.00035              | DLG4,NRXN1                                 |
| GO:2000311 | regulation of AMPA receptor activity                               | 2                   | 20                    | 0.00035              | NRXN1,SHANK1                               |
| GO:0120035 | regulation of plasma membrane bounded cell projection organization | 4                   | 600                   | 0.00039              | DLG4,NRXN1,SHANK1,SYT3                     |

|            |                                                        |   |       |         |                                           |
|------------|--------------------------------------------------------|---|-------|---------|-------------------------------------------|
| GO:0097120 | receptor localization to synapse                       | 2 | 23    | 0.0004  | DLG4,NRXN1                                |
| GO:0001941 | postsynaptic membrane organization                     | 2 | 24    | 0.00041 | DLG4,NRXN1                                |
| GO:0048699 | generation of neurons                                  | 5 | 1422  | 0.00043 | DLG4,NRXN1,NRXN3,SHANK1,SYT3              |
| GO:0021700 | developmental maturation                               | 3 | 216   | 0.00051 | DLG4,NRXN1,SHANK1                         |
| GO:0010976 | positive regulation of neuron projection development   | 3 | 251   | 0.0007  | DLG4,SHANK1,SYT3                          |
| GO:0051130 | positive regulation of cellular component organization | 4 | 1128  | 0.0025  | DLG4,NRXN1,SHANK1,SYT3                    |
| GO:0097479 | synaptic vesicle localization                          | 2 | 92    | 0.0032  | NRXN1,SYT3                                |
| GO:0007269 | neurotransmitter secretion                             | 2 | 95    | 0.0033  | NRXN1,SYT3                                |
| GO:0099504 | synaptic vesicle cycle                                 | 2 | 100   | 0.0036  | NRXN1,SYT3                                |
| GO:0051129 | negative regulation of cellular component organization | 3 | 632   | 0.0063  | DLG4,NRXN1,SHANK1                         |
| GO:0071248 | cellular response to metal ion                         | 2 | 162   | 0.0082  | DLG4,NRXN1                                |
| GO:0061024 | membrane organization                                  | 3 | 729   | 0.0091  | DLG4,NRXN1,SYT3                           |
| GO:0023052 | signaling                                              | 6 | 5108  | 0.0095  | DLG4,GRID1,LRRTM4,NRXN1,NRXN3,SYT3        |
| GO:0051049 | regulation of transport                                | 4 | 1732  | 0.0095  | DLG4,NRXN1,SHANK1,SYT3                    |
| GO:0007154 | cell communication                                     | 6 | 5219  | 0.0104  | DLG4,GRID1,LRRTM4,NRXN1,NRXN3,SYT3        |
| GO:0045859 | regulation of protein kinase activity                  | 3 | 788   | 0.0107  | DLG4,LRRTM4,NRXN1                         |
| GO:0007411 | axon guidance                                          | 2 | 220   | 0.0132  | NRXN1,NRXN3                               |
| GO:0065008 | regulation of biological quality                       | 5 | 3559  | 0.0144  | DLG4,GRID1,NRXN1,SHANK1,SYT3              |
| GO:0051641 | cellular localization                                  | 4 | 2180  | 0.0191  | DLG4,NRXN1,SHANK1,SYT3                    |
| GO:0001525 | angiogenesis                                           | 2 | 297   | 0.0213  | NRXN1,NRXN3                               |
| GO:0016050 | vesicle organization                                   | 2 | 318   | 0.0239  | DLG4,SYT3                                 |
| GO:0042221 | response to chemical                                   | 5 | 4153  | 0.0269  | DLG4,LRRTM4,NRXN1,NRXN3,SHANK1            |
| GO:0032501 | multicellular organismal process                       | 6 | 6507  | 0.0292  | DLG4,GRID1,NRXN1,NRXN3,SHANK1,SYT3        |
| GO:0034613 | cellular protein localization                          | 3 | 1367  | 0.0397  | DLG4,NRXN1,SHANK1                         |
| GO:0022604 | regulation of cell morphogenesis                       | 2 | 442   | 0.0402  | DLG4,SYT3                                 |
| GO:0007165 | signal transduction                                    | 5 | 4738  | 0.0437  | DLG4,GRID1,LRRTM4,NRXN1,NRXN3             |
| GO:0060627 | regulation of vesicle-mediated transport               | 2 | 480   | 0.0454  | DLG4,SYT3                                 |
| GO:0050794 | regulation of cellular process                         | 7 | 10484 | 0.0467  | DLG4,GRID1,LRRTM4,NRXN1,NRXN3,SHANK1,SYT3 |
| GO:0065003 | protein-containing complex assembly                    | 3 | 1514  | 0.0469  | DLG4,NRXN1,SHANK1                         |
| GO:0045860 | positive regulation of protein kinase activity         | 2 | 517   | 0.049   | DLG4,NRXN1                                |
| GO:0009966 | regulation of signal transduction                      | 4 | 3033  | 0.0492  | DLG4,LRRTM4,NRXN1,SHANK1                  |

**Supplementary Table 4:** Rat RRBS sequencing metrics.

| <b>USER ID</b> | <b>TOTAL READ NUMBER<br/>(read pairs)</b> | <b>MAPPING<br/>EFFICIENCY (%)</b> | <b>UNIQUE<br/>CpGs</b> | <b>AVG. CpG<br/>COVERAGE</b> | <b>BISULFITE<br/>CONVERSION RATE (%)</b> |
|----------------|-------------------------------------------|-----------------------------------|------------------------|------------------------------|------------------------------------------|
| RAT-1T         | 27,790,873                                | 25                                | 2,227,723              | 17X                          | 98                                       |
| RAT-2C         | 25,837,561                                | 22                                | 2,187,473              | 14X                          | 98                                       |
| RAT-5C         | 23,882,262                                | 24                                | 2,086,635              | 15X                          | 98                                       |
| RAT-6C         | 26,339,515                                | 23                                | 2,207,304              | 15X                          | 98                                       |
| RAT-7T         | 26,620,354                                | 25                                | 2,291,358              | 16X                          | 99                                       |
| RAT-8C         | 28,111,616                                | 24                                | 2,304,172              | 17X                          | 98                                       |
| RAT-9T         | 25,104,000                                | 23                                | 2,188,362              | 15X                          | 99                                       |
| RAT-10T        | 26,355,902                                | 22                                | 2,104,074              | 16X                          | 98                                       |
| RAT-11C        | 26,787,715                                | 19                                | 1,888,084              | 17X                          | 98                                       |
| RAT-12C        | 27,634,936                                | 23                                | 2,204,322              | 16X                          | 98                                       |
| RAT-13C        | 28,557,777                                | 31                                | 2,427,768              | 19X                          | 98                                       |
| RAT-14C        | 29,019,936                                | 33                                | 2,504,894              | 20X                          | 98                                       |
| RAT-15T        | 23,085,177                                | 31                                | 2,327,653              | 16X                          | 98                                       |
| RAT-16T        | 23,692,161                                | 31                                | 2,295,185              | 17X                          | 98                                       |
| RAT-17C        | 27,598,160                                | 29                                | 2,368,799              | 18X                          | 98                                       |
| RAT-18T        | 27,537,998                                | 31                                | 2,352,778              | 19X                          | 98                                       |
| RAT-19T        | 25,783,780                                | 24                                | 1,932,160              | 19X                          | 98                                       |

Summary of rat RRBS sequencing parameters. T denotes THC-exposed rats, C denotes control rat.
